## Disrupted sleep in dystonia depends on cerebellar function but not motor symptoms in mice

Luis E. Salazar Leon<sup>1,2,5</sup> and Roy V. Sillitoe<sup>1,2,3,4,5\*</sup>

<sup>1</sup>Department of Neuroscience, Baylor College of Medicine, Houston, Texas, USA

<sup>2</sup>Department of Pathology & Immunology, Baylor College of Medicine, Houston, Texas, USA

<sup>3</sup>Department of Pediatrics, Baylor College of Medicine, Houston, Texas, USA

<sup>4</sup>Development, Disease Models & Therapeutics Graduate Program, Baylor College of Medicine, Houston, Texas, USA

<sup>5</sup>Jan and Dan Duncan Neurological Research Institute at Texas Children's Hospital, Houston, Texas, 77030, USA

\*Corresponding Author: Dr. Roy V. Sillitoe, [sillitoe@bcm.edu](mailto:sillitoe@bcm.edu)

Manuscript information:

Words: Abstract: 216 words

Introduction, Results, and Discussion combined: 5,467 words

Figures: 6

Supplemental Figures: 3

Running title: Cerebellum contribution to dystonia and sleep

**Key words:** Dystonia, sleep, circadian rhythms, Purkinje cells, cerebellar nuclei

## Abstract

Although dystonia is the third most common movement disorder, patients often also experience debilitating nonmotor defects including impaired sleep. The cerebellum is a central component of a “dystonia network” that plays various roles in sleep regulation. Importantly, the primary driver of sleep impairments in dystonia remains poorly understood. The cerebellum, along with other nodes in the motor circuit, could disrupt sleep. However, it is unclear how the cerebellum might alter sleep and mobility. To disentangle the impact of cerebellar dysfunction on motion and sleep, we generated two mouse genetic models of dystonia that have overlapping cerebellar circuit miswiring but show differing motor phenotype severity: *Ptfla<sup>Cre</sup>;Vglut2<sup>fx/fx</sup>* and *Pdx1<sup>Cre</sup>;Vglut2<sup>fx/fx</sup>* mice. In both models, excitatory climbing fiber to Purkinje cell neurotransmission is blocked, but only the *Ptfla<sup>Cre</sup>;Vglut2<sup>fx/fx</sup>* mice have severe twisting. Using *in vivo* ECoG and EMG recordings we found that both mutants spend greater time awake and in NREM sleep at the expense of REM sleep. The increase in awake time is driven by longer awake bouts rather than an increase in bout number. We also found a longer latency to reach REM in both mutants, which is similar to what is reported in human dystonia. We uncovered independent but parallel roles for cerebellar circuit dysfunction and motor defects in promoting sleep quality versus posture impairments in dystonia.

## 1 **Introduction**

2 Dystonia presents with phenotypic and etiologic heterogeneity. Considered the third most  
3 common movement disorder, “dystonia” does not comprise a single disease or symptom, but rather  
4 describes an array of disorders sharing overlapping behavioral outcomes. While different forms of  
5 dystonia express unique etiologies, substantial evidence implicates the cerebellum as a major node  
6 in the underlying network disruptions<sup>1-4</sup>. Dysfunction of Purkinje cells and the cerebellar nuclei,  
7 the primary outputs of the cerebellar cortex and cerebellum, respectively, are implicated in both  
8 hereditary and idiopathic forms of dystonia<sup>4-7</sup>. Importantly, while cerebellar dysfunction is  
9 sufficient to induce dystonia in animal models, therapies addressing cerebellar dysfunction can  
10 modulate dystonia and reduce motor symptom severity. One such therapy, cerebellar deep brain  
11 stimulation (DBS), has been used to effectively reduce motor symptom severity in both mouse  
12 models<sup>4</sup> and human patients<sup>8,9</sup>, further suggesting a critical cerebellar involvement in the etiology  
13 of dystonia. However, nonmotor behaviors are also relevant to the cerebellum and to dystonia.

14 Along with its known role in regulating motor function, increasing evidence shows that the  
15 cerebellum also serves as a key brain region in the control of a variety of nonmotor behaviors such  
16 as cognitive and emotional processing<sup>10</sup>, associative learning<sup>11</sup>, and reward expectation<sup>11,12</sup>.  
17 Recent work also suggests that the cerebellum may play a role in sleep-related behaviors. Purkinje  
18 cells and cerebellar nuclei neurons have been found to display sleep-dependent activity, increasing  
19 their firing during NREM (non-rapid eye movement) sleep<sup>13-16</sup>. In addition, lesioning of the  
20 cerebellar vermis has been shown to impair sleep, suggesting that normal cerebellar circuitry and  
21 activity are important for maintaining sleep rhythms<sup>17,18</sup>. Numerous studies have shown that  
22 cerebellar disruptions form the basis for the many comorbidities of motor disorders<sup>19-22</sup>. However,  
23 the role of the cerebellum and its circuit components in sleep regulation have not been studied  
24 thoroughly in dystonia. It is known that dystonic patients demonstrate increased sleep latency and  
25 REM (rapid eye movement) latency, and in some cases, persistent involuntary muscle contractions  
26 during sleep<sup>23-25</sup>. It is also noted that therapeutics which successfully alleviate the motor symptoms  
27 of dystonia appear to have little to no effect on the sleep disruptions<sup>26</sup>. The importance of  
28 addressing sleep dysfunction is becoming increasingly apparent in society, as sleep disruptions can  
29 significantly impact quality of life, driving many subsequent comorbidities<sup>27,28</sup>. Disrupted sleep is  
30 also associated with impaired motor learning/function<sup>29-31</sup>, as synaptic activity is normalized  
31 during sleep<sup>32</sup>. Together, the mounting evidence inspires a compelling model in which sleep and

32 motor dysfunction in dystonia comprise two halves of a self-propelling cycle. It is possible that  
33 cerebellar dysfunction drives both the more commonly-appreciated motor abnormalities and the  
34 nonmotor sleep disruptions, although how they emerge needs to be systematically resolved.

35         It remains unclear whether dystonic motor dysfunctions persist during all stages of sleep,  
36 and consistently across different manifestations of the disease; recent evidence from a survey of  
37 cervical dystonia patients suggests that, in cases of idiopathic cervical dystonia, it does<sup>24</sup>. The lack  
38 of clarity on which factors (motor dysfunction and/or cerebellar dysfunction) drive sleep  
39 dysfunction in dystonia highlights the significance of this knowledge gap. To investigate the  
40 relationship between cerebellar dysfunction, motor dysfunction, and sleep, here we used a  
41 constitutively active *Cre/lox-p* system to drive the deletion of the *Vglut2* gene in afferent neurons  
42 that project excitatory fibers that ultimately communicate with the Purkinje cells. *Vglut2* was  
43 deleted using the *Ptf1a* and *Pdx1* gene regulatory elements to spatially drive Cre expression: the  
44 resulting mice had the genotypes *Ptf1a<sup>Cre</sup>;Vglut2<sup>fx/fx</sup>* and *Pdx1<sup>Cre</sup>;Vglut2<sup>fx/fx</sup>*. The *Ptf1a* and *Pdx1*  
45 genes are expressed in the excitatory neurons of the inferior olive, a region of the brainstem, which  
46 projects afferent fibers to the cerebellar cortex and terminate as excitatory climbing fibers<sup>4,33</sup>.  
47 However, *Ptf1a* expression occurs in a wider distribution across the inferior olive relative to *Pdx1*,  
48 and *Pdx1* is also expressed in mossy fiber afferent neurons (Lackey et al., 2023 *in preparation*).  
49 Therefore, the silencing of excitatory climbing fiber synapses occurs with differential coverage in  
50 mice with *Ptf1a*- versus *Pdx1*-driven Cre expression. Only *Ptf1a<sup>Cre</sup>;Vglut2<sup>fx/fx</sup>* mice present with  
51 severe motor dysfunction involving twisting of the torso and hyperextensions of the back and  
52 limbs<sup>4</sup>, while *Pdx1<sup>Cre</sup>;Vglut2<sup>fx/fx</sup>* adult mice show only subtle dystonic behaviors<sup>34</sup>. Thus, the use  
53 of both mouse models allows us to deliberately silence excitatory olivocerebellar synapses while  
54 also providing us with an opportunity to query varying severities of cerebellar dysfunction.

55         In this work, we report that, despite their different dystonia-related motor severities,  
56 *Pdx1<sup>Cre</sup>;Vglut2<sup>fx/fx</sup>* and *Ptf1a<sup>Cre</sup>;Vglut2<sup>fx/fx</sup>* mice display similarly impaired sleep physiology and  
57 circadian rhythms. Both mutants display highly disrupted sleep, spending greater time awake and  
58 at the expense of REM sleep. Furthermore, we found that both the *Pdx1<sup>Cre</sup>;Vglut2<sup>fx/fx</sup>* and  
59 *Ptf1a<sup>Cre</sup>;Vglut2<sup>fx/fx</sup>* mutant mice display increased latency to reach REM, which is similar to what  
60 is observed in human patients with dystonia<sup>23</sup>. Intriguingly, only mice with overt dystonic motor  
61 behaviors (*Ptf1a<sup>Cre</sup>;Vglut2<sup>fx/fx</sup>*) show differences in ECoG spectral power frequency, particularly

62 in the latter half of the time spent asleep. We also found that circadian activity rhythms remain  
63 unchanged across all groups of mice, and that the circadian “master clock” remains ostensibly  
64 unaffected by our circuit manipulation. Our work demonstrates that aberrant cerebellar activity  
65 dually disrupts motor function and sleep, paving the way for improved future therapeutics that may  
66 be able to simultaneously address both motor and sleep dysfunction in the context of motor disease.

67

## 68 Results

### 69 *Ptfla*<sup>Cre</sup>;*Vglut2*<sup>fx/fx</sup> and *Pdx1*<sup>Cre</sup>;*Vglut2*<sup>fx/fx</sup> mice display overlapping cerebellar circuit deficits, 70 but only the *Ptfla*<sup>Cre</sup>;*Vglut2*<sup>fx/fx</sup> mice show overt dystonic symptoms

71 We have previously demonstrated that silencing glutamatergic olivocerebellar synapses  
72 can induce severe dystonic motor phenotypes<sup>4</sup>. To elucidate the relative contributions of cerebellar  
73 versus motor dysfunction on sleep impairments, we additionally leveraged a previously generated  
74 mouse model of cerebellar dysfunction lacking overt motor dysfunction: the *Pdx1*<sup>Cre</sup>;*Vglut2*<sup>fx/fx</sup>  
75 mouse<sup>34</sup> (Supplementary video 1). Both the *Ptfla*<sup>Cre</sup>;*Vglut2*<sup>fx/fx</sup> and *Pdx1*<sup>Cre</sup>;*Vglut2*<sup>fx/fx</sup> mouse  
76 models utilize the Cre/lox-p system to drive the deletion of *Vglut2*, but under different promoters  
77 (Figure 1A). A detailed characterization of the *Ptfla*<sup>Cre</sup>;*Vglut2*<sup>fx/fx</sup> mice and their resulting dystonia  
78 were previously described<sup>4</sup>, whereas the behavior and circuit basis of the *Pdx1*<sup>Cre</sup>;*Vglut2*<sup>fx/fx</sup> mice  
79 will be described extensively in an independent study (Lackey et al., 2023 *in preparation*). While  
80 both models result in the loss of VGLUT2 protein after genetically targeting glutamatergic  
81 olivocerebellar synapses in Purkinje cells (Figure 1B-C), the differential expression patterns of  
82 *Ptfla* (in climbing fiber neurons) and *Pdx1* (in climbing fiber and mossy fiber neurons) yield  
83 differential synapse silencing resulting in different motor phenotypes (Figure 1D, Figure 1  
84 supplement 1). Compared to wildtype littermate controls (Figure 1E), the *Ptfla*<sup>Cre</sup>;*Vglut2*<sup>fx/fx</sup> mice  
85 display overt dystonic motor phenotypes and dystonic behaviors (Figure 1F), while the  
86 *Pdx1*<sup>Cre</sup>;*Vglut2*<sup>fx/fx</sup> mice do not display overt dystonic motor phenotypes such as spontaneous  
87 twisting postures and hyperextension of the back, limbs, or digits (Figure 1G). To better understand  
88 the alterations in motor phenotypes in both mouse models, we implanted mice with cortical  
89 (ECoG) and muscular (EMG) electrodes for *in vivo* monitoring. We calculated the overall EMG  
90 power in the 0-30Hz frequency range, which has been previously used to quantitatively diagnose  
91 dystonia in human patients<sup>35</sup> (representative EMG traces per genotype; Figure 1H). As predicted,  
92 the overall EMG power was significantly elevated in the *Ptfla*<sup>Cre</sup>;*Vglut2*<sup>fx/fx</sup> mice as compared to  
93 the control and *Pdx1*<sup>Cre</sup>;*Vglut2*<sup>fx/fx</sup> mice (Figure 1H-I). The EMG activity reflects prolonged over-  
94 contractions, which is a key phenotype observed in human patients with generalized and focal  
95 dystonia. Additionally, we found that this elevation of cervical EMG activity was maintained  
96 during all states, including both REM and NREM sleep (Figure 1 supplement 2, B-E). These  
97 findings support the idea that *Ptfla*<sup>Cre</sup>;*Vglut2*<sup>fx/fx</sup> mice display elevated muscle activity due to  
98 cerebellar dysfunction, while *Pdx1*<sup>Cre</sup>;*Vglut2*<sup>fx/fx</sup> mice do not. These results further suggest that

99 cerebellar circuit manipulations can occur without causing overt and severe motor dysfunctions  
100 and furthermore establishes the two mouse models for use in subsequent experiments in this study.

101

## 102 **Circadian activity is unchanged in *Ptfla*<sup>Cre</sup>;*Vglut2*<sup>fx/fx</sup> and *Pdx1*<sup>Cre</sup>;*Vglut2*<sup>fx/fx</sup> mutant mice**

103 Wheel-running activity is commonly used in rodents as a proxy for measuring daily activity  
104 patterns<sup>36</sup>. Previous work has used wheel-running to understand circadian activity in other mouse  
105 models of movement disorders (for example, mild ataxia)<sup>37</sup>. Therefore, we sought to determine the  
106 extent of circadian activity disruption in *Ptfla*<sup>Cre</sup>;*Vglut2*<sup>fx/fx</sup> and *Pdx1*<sup>Cre</sup>;*Vglut2*<sup>fx/fx</sup> mutant mice.  
107 Mice were singly housed with *ad libitum* access to food, water, and a running wheel in their home  
108 cage (Figure 2A). Wheel revolutions were automatically monitored throughout the recording  
109 period that lasted 35-days (14 days baseline (LD; light-dark), 21 days constant condition (DD;  
110 dark-dark periods; Figure 2B)). The collected data were analyzed and plotted as actograms for ease  
111 of viewing; each row represents a day and black tick marks represent revolutions of the running  
112 wheel, indicative of locomotor activity. Data is double plotted (as convention), such that 48-hours  
113 of activity are plotted on the same line, to better visualize changes in activity patterns<sup>36</sup>. We  
114 predicted that differences in circadian activity patterns in our mutant mice would arise either from  
115 motor dysfunction or our cerebellar circuit manipulation. Given that *Pdx1*<sup>Cre</sup>;*Vglut2*<sup>fx/fx</sup> mice do  
116 not display severe dystonic motor behaviors, and the extent of their olivocerebellar manipulation  
117 is restricted relative to *Ptfla*<sup>Cre</sup>;*Vglut2*<sup>fx/fx</sup> mice, we predicted that their circadian activity profiles  
118 would remain unchanged relative to littermate controls. As expected, we observed normal wheel-  
119 running behavior in *Pdx1*<sup>Cre</sup>;*Vglut2*<sup>fx/fx</sup> mice relative to littermate controls (Figure 2C/E). We also  
120 found that despite their overt motor dysfunction, *Ptfla*<sup>Cre</sup>;*Vglut2*<sup>fx/fx</sup> mice did voluntarily run on  
121 the wheel and maintain rhythmic behavior, though after a longer (8-days) acclimation period  
122 (Figure 2D). We observed significantly lower average activity counts for *Ptfla*<sup>Cre</sup>;*Vglut2*<sup>fx/fx</sup> mice  
123 with overt motor dysfunction during both LD and DD paradigms (Figure 2F-G). Nevertheless,  
124 both *Pdx1*<sup>Cre</sup>;*Vglut2*<sup>fx/fx</sup> and *Ptfla*<sup>Cre</sup>;*Vglut2*<sup>fx/fx</sup> mice displayed characteristic nocturnal behavior  
125 even during the DD phase, similar to controls (Figure 2C-E). We also assessed endogenous  
126 circadian period length (tau), a measure of the period of a circadian rhythm. The tau length refers  
127 to the length of time it takes for the rhythm to complete one cycle<sup>36</sup>. At the end of the DD paradigm,  
128 all mice displayed an average tau of ~23.7hrs (Figure 2H). This slight deviation from 24hrs is  
129 expected, as endogenous tau length in mice is slightly less than 24hrs<sup>36</sup>. In addition, we also found

130 that the “siesta” period — a brief bout of sleep during the active period<sup>38</sup> — in *Ptf1a<sup>Cre</sup>;Vglut2<sup>fx/fx</sup>*  
131 mice is significantly longer by 7-10 minutes (Figure 2I). However, this increase may be a result of  
132 the low background activity for *Ptf1a<sup>Cre</sup>;Vglut2<sup>fx/fx</sup>* mice. To validate that our genetic manipulation  
133 of *Vglut2* did not significantly alter the major sleep center of the brain, we assessed *Vglut2* mRNA  
134 expression in control *Ptf1a<sup>Cre</sup>* and *Pdx1<sup>Cre</sup>* mice (without *floxed* alleles of *Vglut2*) using *in situ*  
135 hybridization. We found a lack of *Vglut2* expression in the suprachiasmatic nucleus (SCN) “master  
136 clock”. This was anticipated since the SCN is a heavily GABAergic region<sup>39</sup> (*Vgat*-expressing,  
137 Figure 2 supplement 1). These results suggest that in the *Pdx1<sup>Cre</sup>;Vglut2<sup>fx/fx</sup>* and *Ptf1a<sup>Cre</sup>;Vglut2<sup>fx/fx</sup>*  
138 mice, circadian rhythms remain largely unchanged despite cerebellar and motor dysfunction.

139

### 140 **Cerebellar dysfunction disrupts sleep stages independently of the dystonic phenotype**

141 The relationship between sleep and motor function is particularly relevant in dystonia, as  
142 reports suggest that motor symptoms are easier to manage after a good night’s sleep, and earlier in  
143 the morning, shortly after waking up<sup>40</sup>. Therefore, a major goal was to determine the overall sleep  
144 quality in *Ptf1a<sup>Cre</sup>;Vglut2<sup>fx/fx</sup>* and *Pdx1<sup>Cre</sup>;Vglut2<sup>fx/fx</sup>* mice. We implanted *Ptf1a<sup>Cre</sup>;Vglut2<sup>fx/fx</sup>* and  
145 *Pdx1<sup>Cre</sup>;Vglut2<sup>fx/fx</sup>* mice with ECoG/EMG electrodes that were made out of silver wire and  
146 recorded signals continuously for 8-hrs during the light phase (Figure 3A-C). Raw ECoG/EMG  
147 waveforms show that both *Ptf1a<sup>Cre</sup>;Vglut2<sup>fx/fx</sup>* and *Pdx1<sup>Cre</sup>;Vglut2<sup>fx/fx</sup>* mice display characteristic  
148 spectral activity which defines wake, NREM, and REM sleep (Figure 3D). We also note that high-  
149 amplitude spikes in the EMG activity were observed in *Ptf1a<sup>Cre</sup>;Vglut2<sup>fx/fx</sup>* mice during brief  
150 periods of wake, indicative of motor dysfunction, while no such phenomenon was observed in the  
151 *Pdx1<sup>Cre</sup>;Vglut2<sup>fx/fx</sup>* mice (Figure 3D). We then assessed the total time spent awake, in NREM sleep,  
152 and in REM sleep. While sleep cycles in mice are shorter than in humans, they do follow the  
153 similar pattern of wake, followed by NREM, and then REM sleep (Figure 3E). Representative  
154 hypnograms of 1-hour of total recording time showed that both the *Ptf1a<sup>Cre</sup>;Vglut2<sup>fx/fx</sup>* and  
155 *Pdx1<sup>Cre</sup>;Vglut2<sup>fx/fx</sup>* mice displayed disrupted sleep. The periods of wake were more frequent and  
156 last longer compared to the littermate controls (Figure 3F). We found that both *Pdx1<sup>Cre</sup>;Vglut2<sup>fx/fx</sup>*  
157 and *Ptf1a<sup>Cre</sup>;Vglut2<sup>fx/fx</sup>* mice spent more time awake and in NREM at the expense of decreased  
158 REM sleep (Figure 3G-I). These results suggest that, although motor dysfunction may occur in  
159 brief periods of spontaneous wakefulness (*Ptf1a<sup>Cre</sup>;Vglut2<sup>fx/fx</sup>*), cerebellar dysfunction alone may  
160 be sufficient to alter sleep activity independent from gross motor dysfunction (*Pdx1<sup>Cre</sup>;Vglut2<sup>fx/fx</sup>*).



161

162 **Disrupted sleep patterns occur independent of overt dystonic motor dysfunction when**  
163 **comparing *Ptfla*<sup>Cre</sup>;*Vglut2*<sup>fx/fx</sup> and *Pdx1*<sup>Cre</sup>;*Vglut2*<sup>fx/fx</sup> models of dystonia**

164 We observed that cerebellar dysfunction was sufficient to disrupt sleep stages in  
165 *Ptfla*<sup>Cre</sup>;*Vglut2*<sup>fx/fx</sup> and *Pdx1*<sup>Cre</sup>;*Vglut2*<sup>fx/fx</sup> mice, mouse models with and without overt dystonic  
166 motor phenotypes, respectively. However, the fluctuations in the frequency of sleep stages or  
167 length of sleep states, both of which could be driving the observed differences in sleep versus  
168 awake time, remained unclear (Figure 4A). Therefore, to further understand the fragility of sleep  
169 stages, and the disruption of each stage, we calculated both the total number of sleep-stage bouts  
170 along with the average length of bouts for wake, NREM, and REM. We note that these calculations  
171 were performed after the onset of sleep, which was determined using a similar approach to previous  
172 work<sup>41</sup> (Figure 4B). We found that the total number of wake bouts was not different between  
173 *Ptfla*<sup>Cre</sup>;*Vglut2*<sup>fx/fx</sup>, *Pdx1*<sup>Cre</sup>;*Vglut2*<sup>fx/fx</sup>, and the littermate controls (Figure 4C). However, for both  
174 *Pdx1*<sup>Cre</sup>;*Vglut2*<sup>fx/fx</sup> and *Ptfla*<sup>Cre</sup>;*Vglut2*<sup>fx/fx</sup> mutant mice, the awake bouts were significantly longer  
175 than in controls, by an average of ~67 minutes (Figure 4D). To examine the disruptions in sleep  
176 stages after sleep onset, we calculated the total number of REM and NREM bouts. We found that  
177 both the *Pdx1*<sup>Cre</sup>;*Vglut2*<sup>fx/fx</sup> and *Ptfla*<sup>Cre</sup>;*Vglut2*<sup>fx/fx</sup> mice displayed an increase in the overall  
178 number of NREM bouts coupled with fewer REM bouts (Figure 4G, 4E), while the average length  
179 of both REM and NREM bouts remained the same between all groups (Figure 4H, 4F). Previous  
180 work in human patients with cervical dystonia suggests that dystonic patients display an increased  
181 latency to sleep, with a particular effect on the REM stage of sleep<sup>23</sup>. We hypothesized that these  
182 phenotypes may be recapitulated in the *Pdx1*<sup>Cre</sup>;*Vglut2*<sup>fx/fx</sup> and *Ptfla*<sup>Cre</sup>;*Vglut2*<sup>fx/fx</sup> mice. Therefore,  
183 we calculated the latency to reach REM and NREM sleep, as this could further indicate whether  
184 sleep dysfunction is primarily related to falling asleep versus staying asleep (or both). While both  
185 groups of mutant mice displayed a normal latency to reach NREM sleep (Figure 4J), latency to  
186 reach REM sleep was significantly elevated in both groups by an average of 47 minutes (Figure  
187 4I). Together, these experiments highlight the specific deficits of sleep architecture that have been  
188 disordered in the *Pdx1*<sup>Cre</sup>;*Vglut2*<sup>fx/fx</sup> and *Ptfla*<sup>Cre</sup>;*Vglut2*<sup>fx/fx</sup> mutant mice, and that the same deficits  
189 occur in both groups independently of how severe and constant the motor phenotype may be.

190

191 **Changes in delta, beta, and gamma spectral power may underlie sleep state impairments in**  
192 ***Ptf1a<sup>Cre</sup>;Vglut2<sup>fx/fx</sup>* but not *Pdx1<sup>Cre</sup>;Vglut2<sup>fx/fx</sup>* mice**

193 Arousal states are defined, in part, by spectral frequency oscillations that occur across  
194 specific frequency bands, ranging from 0.5 to >100Hz (5A). Accordingly, changes in sleep stages  
195 are marked by changes in delta (0.5Hz – 4Hz in mice) or theta (5Hz – 8Hz in mice) power,  
196 indicating both an increase or a decrease in sleep quality.<sup>42,43</sup> Therefore, changes in spectral power  
197 can give some insight as to how sleep/wake dynamics are being interrupted at the neuronal level.  
198 As dystonia is a heterogenous motor disorder<sup>1</sup>, and our two mouse models show differing severity  
199 in dystonic motor symptoms overall, we predicted that between the models we would see specific  
200 differences in ECoG spectral activity in sleep-dependent frequency bands. Such analysis may also  
201 provide insight into the potential mechanisms of sleep dysfunction, given that different frequency  
202 bands can be used to report on changes in overall brain connectivity<sup>44</sup>. We therefore sought to  
203 determine whether the *Pdx1<sup>Cre</sup>;Vglut2<sup>fx/fx</sup>* and the *Ptf1a<sup>Cre</sup>;Vglut2<sup>fx/fx</sup>* mice displayed measurable  
204 differences in spectral power across frequency bands of interest (Figure 5B), relative to controls.  
205 We implanted mice with two cortical (ECoG) electrodes to detect changes in oscillation power  
206 spectral frequency at various sleep stages. We calculated overall average spectral power frequency  
207 from two independent ECoG electrodes placed over the parietal cortex and the frontal cortex, to  
208 measure delta (0.5-4Hz), theta (5-8Hz), alpha (8-13Hz), beta (13-30Hz), and gamma (35-44Hz)  
209 frequency bands. *Ptf1a<sup>Cre</sup>;Vglut2<sup>fx/fx</sup>*, but not the *Pdx1<sup>Cre</sup>;Vglut2<sup>fx/fx</sup>* mice, displayed differential  
210 spectral power frequencies in the frontal cortex for delta and beta frequency bands (Figure 5C, 5I).  
211 Specifically, delta power was significantly increased relative to the controls, while beta power was  
212 decreased. As delta power can be an effective indicator of NREM sleep, this observed increase  
213 may reflect the overall increased time spent in NREM sleep that the *Ptf1a<sup>Cre</sup>;Vglut2<sup>fx/fx</sup>* mice  
214 display. We also note that although gamma power was decreased in *Ptf1a<sup>Cre</sup>;Vglut2<sup>fx/fx</sup>* mice, the  
215 change did not meet the threshold for significance (Figure 5K). Overall, theta and alpha power  
216 were unchanged from controls for *Ptf1a<sup>Cre</sup>;Vglut2<sup>fx/fx</sup>* and *Pdx1<sup>Cre</sup>;Vglut2<sup>fx/fx</sup>* mice (Figure 5E, 5G).

217 Sleep, and by extension the spectral oscillations defining sleep, are known to possess some  
218 intrinsic rhythmicity. Therefore, we also sought to determine whether the observed changes in  
219 spectral frequency power displayed temporal properties. To do this, we divided each animal's sleep  
220 recording into 3 distinct periods. After performing spectral frequency analysis, we found that  
221 *Ptf1a<sup>Cre</sup>;Vglut2<sup>fx/fx</sup>* mice continue to display increased delta and decreased beta power (Figure 5D,

222 5J). Interestingly, for both frequency bands, spectral power was only different during mid (ZT6-  
223 8) and late (ZT8-10) recording periods. For Gamma power, a significant decrease was only  
224 observed during the mid-recording period for both *Pdx1<sup>Cre</sup>;Vglut2<sup>fx/fx</sup>* and *Ptfla<sup>Cre</sup>;Vglut2<sup>fx/fx</sup>* mice  
225 (Figure 5L). As we observed with overall power, neither theta nor alpha showed differences when  
226 we calculated changing power over time (Figure 5F, 5H). These data demonstrate that measurable  
227 spectral frequency changes accompany sleep impairments in dystonia, but predominantly in  
228 *Ptfla<sup>Cre</sup>;Vglut2<sup>fx/fx</sup>* mice that experience overt motor dysfunction. The data indicate the possibility  
229 that while sleep impairments arise from cerebellar dysfunction in dystonia, the overt motor defects,  
230 which can arise in parallel, can also influence specific aspects of sleep physiology in the disease.  
231  
232

## 233 Discussion

234 We genetically dissected the interaction between sleep impairments and cerebellar-  
235 initiated motor impairments in two mouse models of dystonia. Altogether, the results from this  
236 work provide insight into the unique sleep, ECoG, and EMG disturbances observed in our mouse  
237 models of cerebellar circuit dysfunction (Figure 6A). We found that sleep impairments, a common  
238 nonmotor symptom in human dystonia, occur in *Ptfla<sup>Cre</sup>;Vglut2<sup>fx/fx</sup>* and *Pdx1<sup>Cre</sup>;Vglut2<sup>fx/fx</sup>* mouse  
239 models of cerebellar miswiring, with and without severe dystonia-related motor dysfunctions. We  
240 show that both groups of mutant mice display an increase in the length of wake bouts, increased  
241 NREM and more frequent NREM bouts, and decreased REM and less frequent REM bouts (Figure  
242 6A). While existing studies on sleep quality in dystonia patients is limited, our results are striking  
243 in that they reflect patterns of sleep deficits observed in dystonia patients<sup>23–25</sup>. We also highlight  
244 our finding that motor activity in *Ptfla<sup>Cre</sup>;Vglut2<sup>fx/fx</sup>* mice remains elevated in all stages of sleep,  
245 even during REM. This result is particularly intriguing. Existing studies are split, some suggesting  
246 that abnormal muscle activity in dystonic patients disappears during sleep<sup>23</sup> while other indicate  
247 that it might persist during sleep<sup>24</sup>. On the one hand, it is possible that our results indicate that  
248 dysfunction of the mechanisms involved in synaptic renormalization are affected in dystonia,  
249 which are believed to occur during sleep and mediate muscle recovery and atonia during  
250 sleep<sup>32,45,46</sup>. On the other hand, as a reconciling interpretation, the work we presented here could  
251 also suggest that cerebellar dysfunction, in the presence or absence of dystonic motor dysfunction,  
252 is sufficient to drive nonmotor impairments in sleep in mouse models of dystonia (Figure 6B).  
253 Existing knowledge suggests that the cerebellum and its circuit components (namely, the Purkinje  
254 cells and cerebellar nuclei neurons) are a key node in dystonia<sup>4,47</sup>. Therefore, our results may point  
255 to the cerebellum as a central dystonia locus, which could help to anchor future studies on the  
256 development of therapies that can address motor and nonmotor (sleep) dysfunction in dystonia.

257 Evidence from case-control studies in patients with cervical dystonia suggests that human  
258 patients with dystonia exhibit distinct abnormalities in their circadian rhythms, including fatigue  
259 and excessive daytime sleepiness<sup>25,26,48</sup>. We sought to understand if the clinical symptoms of  
260 dystonia that are relevant to sleep were observed in our two mouse models that exhibit cerebellar  
261 dysfunction, with and without motor deficits. Our results show that both *Pdx1<sup>Cre</sup>;Vglut2<sup>fx/fx</sup>* and  
262 *Ptfla<sup>Cre</sup>;Vglut2<sup>fx/fx</sup>* mice display normal circadian timing of behavior (Figure 2C-E,H), suggesting  
263 that cerebellar dysfunction and motor deficits do not impact overall circadian behavior. Although

264 these data are intriguing, given the substantial sleep impairments experienced by these mice, this  
265 finding is in line with work in mice with cerebellar ataxia, which also show normal circadian  
266 wheel-running behavior<sup>37</sup>. To make sure that our genetic manipulation in each model did not  
267 disrupt activity in the SCN master clock, we verified in our mice existing work, which states that  
268 the SCN is 95% GABAergic in its neuronal identity<sup>39</sup>. In accordance with our *in situ* hybridization  
269 results (Figure 2 figure supplement 1), this may indicate that while the cerebellum is involved in  
270 the regulation of sleep, its role in circadian timekeeping is limited, at least in the current context.  
271 Indeed, while numerous projections exist between the cerebellum and the major circadian centers  
272 of the brain, including the hypothalamus, locus coeruleus, and pedunculopontine nucleus, direct  
273 projections between the cerebellum and the SCN master clock are lacking<sup>49,50</sup>. It is possible then  
274 that cerebellar access to circadian processes is tightly regulated and restricted to sleep rather than  
275 overall activity rhythms. In this case, the fatigue and excessive daytime sleepiness experienced by  
276 patients with dystonia may be attributed to lack of sleep rather than aberrant circadian timekeeping.

277 While dystonia is commonly considered a network disorder in humans<sup>1</sup>, our genetic  
278 manipulation attempts to recreate the circuit-wide defects through a mechanism that initiates the  
279 dystonia by precisely blocking glutamatergic signaling in the cerebellum. Although both *Pdx1* and  
280 *Ptfla* are expressed in several brain regions, including in the hypothalamus, neither *Pdx1* nor *Ptfla*  
281 is expressed in the SCN, the circadian master clock of the brain<sup>33,51</sup>. Furthermore, as discussed  
282 before, over 95% of the cells in the suprachiasmatic nucleus are GABAergic<sup>39</sup>, which further  
283 suggests that our genetic manipulation does not extend to directly affect the master clock. Indeed,  
284 our analysis of *Vglut2* mRNA expression showed that *Vglut2* expression in the suprachiasmatic  
285 nucleus is sparse (Figure 2 figure supplement 1). As suggested by existing work, these regions  
286 instead heavily express *Vgat*, indicative of using primarily GABAergic signaling. Therefore, it is  
287 possible that human dystonia patients do experience malfunctioning circadian rhythmicity, but our  
288 model is unable to capture this specific aspect of heterogeneity in dystonia network dysfunction.

289 While overall circadian rhythm patterns remained unchanged in our mutant mice, we did  
290 observe a difference in siesta time for *Ptfla<sup>Cre</sup>;Vglut2<sup>fx/fx</sup>* mice. The siesta period is a brief bout of  
291 sleep during the active period<sup>38</sup>; it represents an important output of the circadian systems' sleep  
292 regulation process<sup>38,52</sup>. Thus, it serves as an additional marker of typical circadian rhythmicity. We  
293 note that the siesta period in the *Ptfla<sup>Cre</sup>;Vglut2<sup>fx/fx</sup>* mice does appear more pronounced and is

294 significantly longer by 7-9 minutes (Figure 2I). However, given the low overall activity profile of  
295 the *Ptfla<sup>Cre</sup>;Vglut2<sup>fx/fx</sup>* mice, it is difficult to determine whether this increase in siesta time is  
296 circadian in origin, or if it arises as a result of the decreased overall activity, making the accurate  
297 calculation of siesta onset/offset difficult. Recent work does suggest that daily timing of the siesta  
298 is under control of the SCN<sup>53</sup>, which we have determined to be spared from our genetic  
299 manipulation. Together, these data further support the finding that circadian rhythmicity is largely  
300 unaffected in *Ptfla<sup>Cre</sup>;Vglut2<sup>fx/fx</sup>* mice and also in the *Pdx1<sup>Cre</sup>;Vglut2<sup>fx/fx</sup>* model of dystonia.

301 Human studies suggest that alterations in sleep efficiency and sleep latency are prevalent  
302 in dystonia patients<sup>19,23,24,26,48,49</sup>. We found that changes in sleep/wake dynamics are of particular  
303 interest, as they begin to explain the specific ways in which sleep deficits arise in the disease. Our  
304 results further suggest that REM disruption may be one of the primary sleep deficits encountered  
305 by our mouse models. We found not only that our mutants spend less time in REM, but that this  
306 impairment is complemented by an increase in both wake and NREM sleep (Figure 3G-I). Though  
307 mice sleep in bouts of 120-180 seconds per full sleep cycle<sup>54</sup> and not in long consolidated bouts  
308 like humans, they do follow similar sleep stage patterns (Figure 3E). Despite REM representing  
309 the lightest sleep stage, it is typically preceded by NREM sleep<sup>55</sup>. Therefore, the increase in NREM  
310 sleep combined with decrease in REM sleep suggests that the sleep deficits in our mice specifically  
311 result from involuntary waking during NREM sleep. This is further evidenced by our EMG results  
312 for the *Ptfla<sup>Cre</sup>;Vglut2<sup>fx/fx</sup>* mice, which display elevated cervical EMG power in all sleep states  
313 (Figure 1 figure supplement 1). As mice must pass through NREM again before entering REM as  
314 they start a new sleep cycle, this prolongs the time spent in NREM while decreasing the time spent  
315 in REM. Further work needs to be conducted in order to connect our findings in mice to human  
316 patients with dystonia, as an equivalent result in humans could potentially explain the reported  
317 symptoms of daytime fatigue. Even if the total sleep time is similar between dystonic and non-  
318 dystonic patients, the quality of sleep is still being affected, as proportions of NREM versus REM  
319 during the sleeping phase are equally as important as overall time spent asleep versus awake<sup>55</sup>.

320 Given the cerebellums' known projections to/from a variety of cortical regions involved  
321 not only in sleep regulation, but also regulation of specific sleep stages (NREM and REM)<sup>49,50,56</sup>,  
322 it was not unsurprising to find that sleep-stage specific deficits exist in both *Pdx1<sup>Cre</sup>;Vglut2<sup>fx/fx</sup>* and  
323 *Ptfla<sup>Cre</sup>;Vglut2<sup>fx/fx</sup>* mice. Other groups have found that dystonia patients<sup>23,26</sup> and mouse models of

324 motor dysfunction<sup>57</sup> present with sleep-stage specific deficits. Our findings of increased average  
325 wake bout length (Figure 4D), increased number of NREM bouts (Figure 4G) and decreased  
326 number of REM bouts (Figure 4E) specifically highlight and further reinforce our main findings  
327 of impairments in overall sleep stage timing. These results highlight the existence of significant  
328 REM-related sleep deficits. This is further reflected in our results of increased latency to reach  
329 REM for both *Pdx1<sup>Cre</sup>;Vglut2<sup>fx/fx</sup>* and *Ptfla<sup>Cre</sup>;Vglut2<sup>fx/fx</sup>* mice (Figure 4I). For *Ptfla<sup>Cre</sup>;Vglut2<sup>fx/fx</sup>*  
330 mice, the motor dysfunction may partially explain this result. REM-related sleep impairments are  
331 typically accompanied by some form of motor dysfunction<sup>24,26,57</sup>, as the canonical mechanisms of  
332 muscle atonia during REM are disrupted<sup>58</sup>. However, since our *Pdx1<sup>Cre</sup>;Vglut2<sup>fx/fx</sup>* mouse model  
333 does not display overt motor dysfunction, but still displays the same wake, NREM, and particularly  
334 REM-related deficits, motor dysfunction may not be the sole culprit for impaired sleep. In this  
335 case, cerebellar dysfunction may also be to blame. Indeed, the cerebellum itself and many regions  
336 receiving direct cerebellar innervation are known to be involved in sleep regulation or control  
337 sleep-dependent behaviors, particularly REM regulation<sup>49</sup>. The locus coeruleus regulates  
338 NREM/REM intensity<sup>59</sup> while sending and receiving dense projections to cerebellar Purkinje cells  
339 and the cerebellar nuclei<sup>60-62</sup>. The pedunculopontine nucleus is a known regulator of REM sleep<sup>63</sup>  
340 and also sends/receives inputs between cerebellum and the basal ganglia<sup>64</sup>. Therefore, it is possible  
341 that the cerebellar malfunctions in the *Pdx1<sup>Cre</sup>;Vglut2<sup>fx/fx</sup>* and *Ptfla<sup>Cre</sup>;Vglut2<sup>fx/fx</sup>* mice directly and  
342 indirectly influence REM latency through intermediary regions such as the pedunculopontine  
343 nucleus or the locus coeruleus, or even other regions, all of which play a role in the regulation of  
344 REM sleep and receive/send direct innervation from the cerebellum<sup>50,56,59</sup>. The circuit pathways  
345 mediating the direct versus indirect effects on sleep were not resolved in the current work.  
346 Ultimately, the impaired sleep dynamics further reinforces our results, which suggest that  
347 *Pdx1<sup>Cre</sup>;Vglut2<sup>fx/fx</sup>* and *Ptfla<sup>Cre</sup>;Vglut2<sup>fx/fx</sup>* mice experience interrupted sleep cycles, cutting REM  
348 sleep short or missing it entirely and re-starting subsequent sleep cycles from NREM sleep.

349 Our ECoG spectral activity results are of particular interest from a mechanistic view, as  
350 they may not only explain the factors underlying sleep deficits in *Pdx1<sup>Cre</sup>;Vglut2<sup>fx/fx</sup>* and  
351 *Ptfla<sup>Cre</sup>;Vglut2<sup>fx/fx</sup>* mice but may also serve as additional “biomarkers” that differentiate each group  
352 based on their degree of cerebellar dysfunction. For instance, we observed an increase in delta  
353 power for *Ptfla<sup>Cre</sup>;Vglut2<sup>fx/fx</sup>* but not *Pdx1<sup>Cre</sup>;Vglut2<sup>fx/fx</sup>* mice, which occurs predominantly in the  
354 latter stages of recording (Figure 5C, 5D). The increase for *Ptfla<sup>Cre</sup>;Vglut2<sup>fx/fx</sup>* is in agreement with

355 recent work suggesting that higher delta power is associated with arousal and sleep impairment,  
356 particularly in the context of obstructive sleep apnea which involves both motor dysfunction and  
357 cerebellar dysfunction<sup>65</sup>. However, as delta power in *Pdx1<sup>Cre</sup>;Vglut2<sup>fx/fx</sup>* is also elevated relative to  
358 control mice and is not significantly different from *Ptfla<sup>Cre</sup>;Vglut2<sup>fx/fx</sup>*, there stands the possibility  
359 that the lack of significance stems from the “intermediate” phenotype of *Pdx1<sup>Cre</sup>;Vglut2<sup>fx/fx</sup>* mice.  
360 We have shown that *Pdx1<sup>Cre</sup>;Vglut2<sup>fx/fx</sup>* mice lack overt motor dysfunction (Figure 1H, 1I, Figure  
361 1-figure supplement 2, Supplementary video 1), and that the extent of *Vglut2* deletion in the  
362 cerebellar cortex, at least with respect to the climbing fibers, is less extensive relative to the  
363 *Ptfla<sup>Cre</sup>;Vglut2<sup>fx/fx</sup>* mice (Figure 1-figure supplement 1). Therefore, if we consider each mutant  
364 group as a model for different cerebellar/motor disorders of varying intensity, we expect to see  
365 such differences in spectral power despite similar sleep deficits. In this case, spectral differences  
366 may represent “biomarkers” of disease severity. It is known that changes in delta power can differ  
367 across individuals with different diseases even if all individuals display poor sleep<sup>43</sup>; it is possible  
368 then that *Pdx1<sup>Cre</sup>;Vglut2<sup>fx/fx</sup>* and *Ptfla<sup>Cre</sup>;Vglut2<sup>fx/fx</sup>* mice, even with an overlap in the genetic  
369 manipulations, indeed represent different manifestations of dystonic motor disease. Ultimately,  
370 this is evident with the difference in observed dystonic motor phenotypes between the two groups.  
371 It should be noted though, the measurement of sleep-related spectral difference between the  
372 *Pdx1<sup>Cre</sup>;Vglut2<sup>fx/fx</sup>* and *Ptfla<sup>Cre</sup>;Vglut2<sup>fx/fx</sup>* mice could still intersect with the induced alterations in  
373 the motor program, as movement patterns are known to impact ECoG spectral activity<sup>66</sup>.

374 Additional patterns of significantly different spectral power for *Ptfla<sup>Cre</sup>;Vglut2<sup>fx/fx</sup>* but not  
375 *Pdx1<sup>Cre</sup>;Vglut2<sup>fx/fx</sup>* mice are seen for beta power, indicative of alert wakefulness (Figure 5I, 5J).  
376 While beta power is typically increased in patients with primary insomnia, previous work has  
377 shown that decreased beta activity is also associated with poor sleep quality, particularly in patients  
378 with obstructive sleep apneas<sup>65</sup>. The relationship between the cerebellum and breathing is well-  
379 established and may provide a fruitful avenue for further research in the context of dystonia. The  
380 cerebellum is known to be involved in both the rhythmicity of breathing and in regulating air  
381 hunger<sup>67</sup>; both mechanisms are known to play a role in obstructive sleep apneas<sup>19,68</sup>. It is possible  
382 that *Ptfla<sup>Cre</sup>;Vglut2<sup>fx/fx</sup>* mice, with overt motor dysfunction, have some degree of sleep apnea  
383 behavior, which could contribute to their observed sleep impairment. Interestingly, cortical gamma  
384 power was only significantly changed during the middle of the recording period, for both the  
385 *Pdx1<sup>Cre</sup>;Vglut2<sup>fx/fx</sup>* and the *Ptfla<sup>Cre</sup>;Vglut2<sup>fx/fx</sup>* mutant mice (Figure 5L). While gamma oscillations



386 are typically associated with working memory and attention, human and mouse EEG/ECOG studies  
387 have found that gamma oscillations occur spontaneously during REM and NREM sleep<sup>69,70</sup>. This  
388 may explain why the overall gamma power is not significantly lower for either the  
389 *Pdx1<sup>Cre</sup>;Vglut2<sup>fx/fx</sup>* or *Ptfla<sup>Cre</sup>;Vglut2<sup>fx/fx</sup>* mice, yet it does reach the threshold for significance  
390 during “mid-recording”. *Ptfla<sup>Cre</sup>;Vglut2<sup>fx/fx</sup>* and *Pdx1<sup>Cre</sup>;Vglut2<sup>fx/fx</sup>* mice exhibit an increase in  
391 NREM and a decrease in REM sleep, and gamma oscillations spontaneously occur during both  
392 stages; changes in gamma activity may be effectively “canceled out” due to the opposing NREM  
393 and REM dynamics. While these observed changes in spectral frequency oscillations uncover  
394 some of the potential mechanisms driving the observed changes in sleep in our *Ptfla<sup>Cre</sup>;Vglut2<sup>fx/fx</sup>*  
395 and *Pdx1<sup>Cre</sup>;Vglut2<sup>fx/fx</sup>* mice, we note that attributing sleep disruption to specific directional  
396 changes in any one frequency band is difficult. Both positive and negative changes in average  
397 power, in any frequency band, can be associated with various disease states, and notably with  
398 disordered sleep<sup>42,43</sup>. Therefore, here, we highlight the presence of a change in spectral frequency  
399 power as an indicator of fractured sleep homeostasis in our mouse circuit models of dystonia,  
400 without differentiating the specific directionality of the change in spectral frequency power.

401 Our findings build upon existing evidence from both human patients and mouse models of  
402 motor disease demonstrating that sleep impairments are a common nonmotor symptom in dystonia.  
403 Previous work has been unable to distinguish between dystonia-dependent versus independent  
404 sleep dysfunction, particularly in the context of dystonic motor dysfunction. Importantly, our  
405 results suggest a model in which cerebellar dysfunction alone (Figure 6B), without overt dystonic  
406 motor phenotypes, can drive sleep deficits. This may be an indication of a broader set of network  
407 dysfunctions in dystonia, with the cerebellum located at the center of multiple disease symptoms.

408

409

410 **Ethics**

411           Animal experimentation: All animals were housed in an AALAS-certified facility that  
412 operates on a 14 hour light cycle. Husbandry, housing, euthanasia, and experimental guidelines  
413 were reviewed and approved by the Institutional Animal Care and Use Committee (IACUC) of  
414 Baylor College of Medicine (protocol number: AN-5996).

415

416 **Acknowledgements and Funding Sources**

417 This work was supported by Baylor College of Medicine (BCM), Texas Children's  
418 Hospital, The Hamill Foundation, and the National Institutes of Neurological Disorders and Stroke  
419 (NINDS) R01NS100874, R01NS119301, and R01NS127435 to RVS. Research reported in this  
420 publication was supported by the Eunice Kennedy Shriver National Institute of Child Health &  
421 Human Development of the National Institutes of Health under Award Number P50HD103555 for  
422 use of the Animal Behavior Core and the Cell and Tissue Pathogenesis Core (BCM IDDRC). The  
423 content is solely the responsibility of the authors and does not necessarily represent the official  
424 views of the National Institutes of Health. Support was also provided by a Dystonia Medical  
425 Research Foundation (DMRF) grant to RVS.

426  
427 Research reported in this publication was supported in part by the RNA *In Situ*  
428 Hybridization Core facility at Baylor College of Medicine, which is supported by a Shared  
429 Instrumentation grant from the NIH (S10OD016167) and the NIH IDDRC grant U54HD083092  
430 from the Eunice Kennedy Shriver National Institute of Child Health & Human Development. The  
431 content is solely the responsibility of the authors and does not necessarily represent the official  
432 views of the Eunice Kennedy Shriver National Institute of Child Health & Human Development  
433 or the National Institutes of Health.

434

435 **Author contributions**

436 Technical and conceptual ideas in this work were conceived by LESL and RVS. LESL  
437 performed the experiments and LESL and RVS performed data analysis and data interpretation.  
438 LESL and RVS wrote and edited the manuscript.

439

440 **Conflicts of interest**

441 We have no conflicts of interest to disclose.

442 **Figure Legends**

443 **Figure 1: *Ptfla*<sup>Cre</sup>;*Vglut2*<sup>fx/fx</sup> and *Pdx1*<sup>Cre</sup>;*Vglut2*<sup>fx/fx</sup> mice display differential dystonic motor**  
444 **phenotypes.**

445 (a) Using either the *Ptfla*<sup>Cre</sup> or *Pdx1*<sup>Cre</sup> genetic driver lines, exon 2 of *Vglut2* was selectively  
446 removed and as a result VGLUT2 expression was deleted with spatial specificity. (b) Schematic  
447 illustration demonstrating the result of the *Vglut2* deletion and the subsequent synaptic silencing  
448 in the affected cells. (c) Immunohistochemical staining of the cerebellar cortex, showing Purkinje  
449 cells (blue) and VGLUT2-positive climbing fibers from the inferior olive (gold). Abbreviations:  
450 ML, molecular layer; PCL, Purkinje cell layer. (d) Schematic demonstrating the end-result of the  
451 *Vglut2* deletion in the *Ptfla*<sup>Cre</sup>;*Vglut2*<sup>fx/fx</sup> and *Pdx1*<sup>Cre</sup>;*Vglut2*<sup>fx/fx</sup> mice. *Ptfla*<sup>Cre</sup>;*Vglut2*<sup>fx/fx</sup> mice have  
452 widespread silencing of olivocerebellar glutamatergic synapses, while *Pdx1*<sup>Cre</sup>;*Vglut2*<sup>fx/fx</sup> mice  
453 have comparatively more restricted silencing of a subset of olivocerebellar synapses.  
454 Abbreviations: GC, granule cell; MF, mossy fiber; PC, Purkinje cell, CF, climbing fiber; CN,  
455 cerebellar nuclei; IO, inferior olive. (e) Video still from a control mouse with no atypical function.  
456 (f) Video still demonstrating dystonic postures in a *Ptfla*<sup>Cre</sup>;*Vglut2*<sup>fx/fx</sup> mouse, specifically showing  
457 the hindlimb hyperextension and Straub tail (noted by red and blue arrows). (g) Video still from a  
458 *Pdx1*<sup>Cre</sup>;*Vglut2*<sup>fx/fx</sup> mouse demonstrating the absence of overt dystonic motor dysfunction. (h) Raw  
459 EMG waveforms of trapezius muscle activity for a 3-second period. Control (grey),  
460 *Ptfla*<sup>Cre</sup>;*Vglut2*<sup>fx/fx</sup> (gold), and *Pdx1*<sup>Cre</sup>;*Vglut2*<sup>fx/fx</sup> (purple) mice. (i) Quantification of the overall  
461 EMG activity (0-30Hz) for all mice used in the study. Points on **i** represent individual mice, n=10  
462 per group. Source data and specific p-values for **i** are available in Figure 1-source data 1.

463

464 **Figure 1-figure supplement 1: Deletion of VGLUT2 in the cerebellum is more widespread in**  
465 **the climbing fibers of the *Ptfla*<sup>Cre</sup>;*Vglut2*<sup>fx/fx</sup> mice than in the *Pdx1*<sup>Cre</sup>;*Vglut2*<sup>fx/fx</sup> mice.**

466 (a) Quantification of relative fluorescence units (normalized per area) for each group. (b)  
467 Fluorescence immunohistochemical stain of the cerebellar cortex for a control mouse. Purkinje  
468 cell bodies and axons are shown in blue (labeled with CAR8/IP3R1). Climbing fibers express  
469 VGLUT2 and are labeled in gold. Scale bars are 20um and indicated with white bars. The  
470 molecular layer (ML) and Purkinje cell layer (PCL) are labeled for orientation. (c) Same as (b) but  
471 for a *Ptfla*<sup>Cre</sup>;*Vglut2*<sup>fx/fx</sup> mouse. (d) Same as (b) but for a *Pdx1*<sup>Cre</sup>;*Vglut2*<sup>fx/fx</sup> mouse. Points on **a**

472 represent individual sections (n=4) from 3 mice per group. The source data and specific p-values  
473 for **a** are available in Figure 1-source data 1.

474

475 **Figure 1-figure supplement 2: Cervical EMG activity in *Ptf1a<sup>Cre</sup>;Vglut2<sup>fx/fx</sup>* mice remains**  
476 **elevated in all states.**

477 **(a)** Schematic illustration of a mouse showing the musculature and relative placement of the EMG  
478 electrodes. **(b)** Raw EMG waveforms of trapezius activity (3-seconds) for REM and NREM sleep  
479 for mice of each group. **(c)** Quantification of changing EMG power for control mice. ZT0 = lights  
480 ON, ZT4 = 4-hr after lights on... etc. **(d)** Same as **(c)** but for *Ptf1a<sup>Cre</sup>;Vglut2<sup>fx/fx</sup>* mice. **(e)** Same as  
481 **(c)** but for *Pdx1<sup>Cre</sup>;Vglut2<sup>fx/fx</sup>* mice. Points on **c-e** represent individual mice, n=10 mice per group.  
482 The source data and specific p-values for **c-e** are available in Figure 1-source data 1.

483

484 **Figure 2: *Ptf1a<sup>Cre</sup>;Vglut2<sup>fx/fx</sup>* and *Pdx1<sup>Cre</sup>;Vglut2<sup>fx/fx</sup>* mice display normal circadian**  
485 **rhythmicity.**

486 **(a)** Schematic illustration of the wheel-running setup. **(b)** Timeline of wheel-running experiment.  
487 **(c)** Representative double-plotted actogram for a control mouse. Each row represents a day, black  
488 tick marks represent wheel-running activity (measured as revolutions of the running wheel). Black  
489 shaded regions represent “lights OFF”, unshaded regions represent “lights ON”. **(d)** Same as **(c)**  
490 but for a *Pdx1<sup>Cre</sup>;Vglut2<sup>fx/fx</sup>* mouse. **(e)** Same as **(c)** but for a *Ptf1a<sup>Cre</sup>;Vglut2<sup>fx/fx</sup>* mouse. **(f)**  
491 Quantification of average activity counts per 5min for all mice, only during the LD paradigm. **(g)**  
492 Same as **(f)** but only quantifying activity during the DD paradigm. **(h)** Quantification of circadian  
493 period ( $\tau$ ) for all mice, during the DD paradigm. **(i)** Quantification of “siesta” bout length for all  
494 mice throughout the 35-day recording period. Points on **f-i** represent individual mice, n=9 mice  
495 per group. The source data and specific p-values for **f-i** are available in Figure 2-source data 1.

496

497 **Figure 2-figure supplement 1: The major circadian centers of the hypothalamus are**  
498 **comprised primarily of GABAergic inhibitory neurons.**

499 **(a)** Schematic illustration of a sagittal mouse brain highlighting several brain regions of interest  
500 that are related to circadian behavior. The hypothalamus is shown in blue, the suprachiasmatic  
501 nucleus (SCN) is in green, and the intermediate regions located between the SCN-cerebellum are  
502 shown in orange. **(b)** Images processed using *in situ* hybridization revealing *Vglut2* mRNA

503 expression on sagittal sections cut through the adult mouse brain. The regions of interest are  
504 outlined in white. (c) Same as (b) but for *Vgat* mRNA expression.

505

506 **Figure 3: *Ptf1a<sup>Cre</sup>;Vglut2<sup>fx/fx</sup>* and *Pdx1<sup>Cre</sup>;Vglut2<sup>fx/fx</sup>* mice display disrupted sleep patterns.**

507 (a) Schematic illustration of the experimental timeline. (b) Schematic illustration of a mouse brain  
508 showing the placement of the ECoG/EMG headmount. An image of the headmount and mounting  
509 screws is also shown in the bottom left. (c) Video still from a sample sleep recording showing the  
510 experimental setup while a mouse is being recorded. (d) Raw waveforms of EMG activity (top  
511 trace for each sample) and ECoG activity (bottom two traces for each sample) for representative  
512 mice from each group. Each example is 60-seconds in length. Sleep stage, as determined by  
513 SPINDLE (see Methods), is noted under each example. Dotted red lines are added to help  
514 distinguish each sleep/wake state. (e) Schematic showing sleep stages and their organization for a  
515 mouse. (f) Hypnograms for a single representative mouse from each group, for the same 1-hr  
516 period, ZT7-ZT8, where ZT0 = lights ON, ZT1 = 1-hr after lights ON, etc. Periods of wake are  
517 highlighted in red. (g) Quantification of total time spent awake for all mice in each group. (h)  
518 Quantification of the total time spent in REM for all mice in each group. (i) Quantification of the  
519 total time spent in NREM for all mice in each group. Points on g-i represent individual mice, n=10  
520 mice per group. The source data and specific p-values for g-i are shown in Figure 3-source data 1.

521

522 **Figure 4: *Pdx1<sup>Cre</sup>;Vglut2<sup>fx/fx</sup>* and *Ptf1a<sup>Cre</sup>;Vglut2<sup>fx/fx</sup>* mutant mice display equivalent**  
523 **impairments in sleep.**

524 (a) Schematic with hypnogram examples of how possible forms of sleep disruption may appear.  
525 (b) Schematic showing sleep recording timeline and how sleep onset, NREM latency, and REM  
526 latency were defined and calculated, similar to Hunsley & Palmiter, 2004<sup>41</sup>. (c) Quantification of  
527 the total number of wake bouts. (d) Quantification of the average length of wake bouts. (e)  
528 Quantification for the number of REM bouts after sleep onset. (f) Quantification for the average  
529 length of REM bouts. (g) Quantification for the number of NREM bouts after sleep onset. (h)  
530 Quantification of the average length of NREM bouts. (i) Quantification of the latency to REM  
531 sleep. (j) Quantification of the latency to NREM sleep. Points on c-j represent individual mice,  
532 n=10 mice per group. The source data and specific p-values for c-j are available in Figure 4-source  
533 data 1.

534

535 **Figure 5: *Ptfl1a<sup>Cre</sup>;Vglut2<sup>fx/fx</sup>* mice show differences in spectral frequency oscillations that**  
536 **define arousal states.**

537 **(a)** 2.5-second samples of raw ECoG waveforms for awake, REM, and NREM from a control  
538 mouse. **(b)** 1-second samples of raw ECoG waveforms for frequency bands of interest, from a  
539 control mouse. **(c)** Quantification of delta power (0-4Hz). Average power across the entire  
540 recording period. **(d)** Quantification of the changing delta power across the recording period. **(e)**  
541 Quantification of theta power (5-8Hz). Average power across the entire recording period. **(f)**  
542 Quantification of the changing theta power across the recording period. **(g)** Quantification of alpha  
543 power (8-13Hz). Average power across the entire recording period.. **(h)** Quantification of the  
544 changing alpha power across the recording period. **(i)** Quantification of beta power (13-30Hz).  
545 Average power across the entire recording period. **(j)** Quantification of the changing beta power  
546 across the recording period. **(k)** Quantification of gamma power (35-44Hz). Average power across  
547 the entire recording period. **(l)** Quantification of the changing gamma power across the recording  
548 period. Points on **c-l** represent individual mice, n=10 mice per group. The source data and specific  
549 p-values for **c-l** are available in Figure 5-source data 1.

550

551 **Figure 6: A model in which cerebellar dysfunction independently drives dystonic motor**  
552 **behavior and sleep impairments in *Ptfl1a<sup>Cre</sup>;Vglut2<sup>fx/fx</sup>* and *Pdx1<sup>Cre</sup>;Vglut2<sup>fx/fx</sup>* mice.**

553 **(a)** A summary of the main findings of this study, stratified for each mouse model. **(b)** A proposed  
554 model of the main finding of this study.

555

556 **Supplementary Video 1: Differential motor phenotypes in *Pdx1<sup>Cre</sup>;Vglut2<sup>fx/fx</sup>* and**  
557 ***Ptfl1a<sup>Cre</sup>;Vglut2<sup>fx/fx</sup>* mice.**

558 A single video of the mutant mice showing the absence (*Pdx1<sup>Cre</sup>;Vglut2<sup>fx/fx</sup>*) and presence  
559 (*Ptfl1a<sup>Cre</sup>;Vglut2<sup>fx/fx</sup>*) of dystonic motor behaviors.

560

561

## 562 **Methods**

### 563 **Animals**

564 All mice used in this study were housed in a Level 3, AALAS-certified facility. All  
565 experiments and studies that involved mice were reviewed and approved by the Institutional  
566 Animal Care and Use Committee of Baylor College of Medicine (BCM AN-5996). Dr Chris  
567 Wright (Vanderbilt University School of Medicine) kindly provided the *Ptfla*<sup>Cre</sup> mice. We  
568 purchased the *Pdx1*<sup>Cre</sup> (Pdx-Cre, #014647) and *Vglut2*<sup>flox<sup>ed</sup></sup> (*Vglut2*<sup>fx</sup>, #012898) mice from The  
569 Jackson Laboratory (Bar Harbor, ME, USA) and then maintained them in our colony using a  
570 standard breeding scheme. The conditional knock-out mice that resulted in dystonia were  
571 generated by crossing *Ptfla*<sup>Cre</sup>;*Vglut2*<sup>fx/fx</sup> heterozygote mice or *Pdx1*<sup>Cre</sup>;*Vglut2*<sup>fx/fx</sup> heterozygote  
572 mice with homozygote *Vglut2*<sup>fx/fx</sup> mice. *Pdx1*<sup>Cre</sup>;*Vglut2*<sup>fx/fx</sup> and *Ptfla*<sup>Cre</sup>;*Vglut2*<sup>fx/fx</sup> mice were  
573 considered experimental animals. A full description of the genotyping details (e.g., primer  
574 sequences and the use of a standard polymerase chain reaction) and phenotype for the  
575 *Ptfla*<sup>Cre</sup>;*Vglut2*<sup>fx/fx</sup> mouse was provided in White and Sillitoe, 2017<sup>4</sup>. A full description of the  
576 genotype and the initial observations of the phenotype of the *Pdx1*<sup>Cre</sup>;*Vglut2*<sup>fx/fx</sup> mouse was  
577 provided in Lackey, 2022<sup>34</sup>. All littermates lacking Cre upon genotyping were considered control  
578 mice. Ear punches were collected before weaning and used for genotyping and identification of  
579 the different alleles. For all experiments, we bred mice using standard timed pregnancies, noon on  
580 the day a vaginal plug was detected was considered embryonic day (E)0.5 and postnatal day (P)0  
581 was defined as the day of birth. Mice of both sexes were used in all experiments.

### 582 **Immunohistochemistry**

583 Perfusion and tissue fixation were performed as previously described<sup>71</sup>. Briefly, mice were  
584 anesthetized by intraperitoneal injection with Avertin (2, 2, 2-Tribromoethanol, Sigma-Aldrich,  
585 St. Louis, MO, USA; catalog #T4). Cardiac perfusion was performed with 0.1 M phosphate-  
586 buffered saline (PBS; pH 7.4), then by 4% paraformaldehyde (4% PFA) diluted in PBS. For  
587 cryoembedding, brains were post-fixed at 4 °C for 24 to 48 h in 4% PFA and then cryoprotected  
588 stepwise in sucrose solutions (15% and 30% diluted in PBS) and embedded in Tissue-Tek O.C.T.  
589 compound (Sakura Finetek, Torrance, CA, USA; catalog #4583). Tissue sections were cut on a  
590 cryostat at a thickness of 40 μm and individual free-floating sections were collected sequentially  
591 and immediately placed into PBS. Our procedures for immunohistochemistry on free-floating  
592 frozen cut tissue sections have been described extensively in previous work<sup>72,73</sup>. After completing



593 the staining steps, the tissue sections were placed on electrostatically coated glass slides and  
594 allowed to dry.

595 Rabbit polyclonal anti-CA VIII (CAR8, 1:500, Proteintech # 12391-1-AP) and rabbit  
596 polyclonal anti-IP3R1 (1:500, Invitrogen # PA1-901) were used to label Purkinje cells. Guinea pig  
597 polyclonal anti-VGLUT2 (1:500, Synaptic systems # 135 404) was used to label olivocerebellar  
598 climbing fibers and their terminals. We visualized immunoreactive complexes using anti-rabbit or  
599 anti-guinea pig secondary antibodies conjugated to Alexa-488 and -647 fluorophores (1:1000 for  
600 both, Invitrogen, Waltham, MA, USA).

### 601 **Tissue preparation and processing for *in situ* hybridization**

602 Mice were anaesthetized with isoflurane and brains were removed from the skull and  
603 immersed in OCT (optimal cutting temperature). Immersed brains were flash frozen by placing  
604 tissue molds onto dry ice. Sagittal sections (25  $\mu$ m) were cut through the cerebellum and the slices  
605 placed onto electrostatically coated glass slides (Probe On Plus Fisher Brand; Fisher Scientific).  
606 The tissue was probed with *Vglut2* (*SLC17A6*) or *Vgat* (*SLC32A1*) digoxigenin-labelled mRNA  
607 probes using an automated *in situ* hybridization procedure (Genepaint). All reagent incubations,  
608 washes and stains were automated and performed by the *in situ* hybridization robot. The signal  
609 was detected by colorimetric detection using BCPI/NBT reagents. After processing was  
610 completed, the slides were removed from the machine and then cover-slipped with permanent  
611 mounting medium (Entellan mounting media, Electron Microscopy Sciences, Hatfield, PA, USA)  
612 and left to dry before imaging.

### 613 **Wheel-running behavior**

614 Recordings were maintained in a ventilated, temperature-controlled, and light-tight room  
615 under either a 12:12 LD cycle or DD conditions. Mice were singly housed in wheel-running cages  
616 and allowed to entrain to the LD cycle for 2-weeks, before being released into DD conditions for  
617 21-days, to assess endogenous circadian timekeeping ability. We assessed period length, activity  
618 onset, and average number of wheel revolutions per 5-minutes using ClockLab Analysis  
619 (Actimetrics).

### 620 **ECoG/EMG sleep recordings**

621 Mice were anesthetized with isoflurane and placed into a stereotaxic device, which  
622 continued to deliver isoflurane throughout surgery. Each mouse with implanted with a

623 prefabricated ECoG/EMG headmount (Pinnacle Technology, Lawrence KS, #8201) with 0.10”  
624 EEG screws to secure headmounts to the skull (Pinnacle Technology, Lawrence KS, #8209). A  
625 midline incision was made, and the skull was exposed. The headmount was affixed to the skull  
626 using cyanoacrylate glue to hold in place while pilot holes for screws were made and screws were  
627 inserted. Screws were placed bilaterally over parietal cortex and frontal cortex. A small amount of  
628 silver epoxy (Pinnacle Technology, Lawrence KS, #8226) was applied to the screw-headmount  
629 connection. Platinum-iridium EMG wires on the prefabricated headmount were placed under the  
630 skin of the neck, resting directly on the trapezius muscles. The headmount was permanently affixed  
631 to the skull using ‘Cold-Cure’ dental cement (A-M systems, #525000 and #526000). Mice were  
632 allowed to recover for 3-4 days before being fitted with a preamplifier (#8202) and tethered to the  
633 recording device (#8204 and #8206-HR). ECoG and EMG signals were sampled at 400Hz with  
634 0.5Hz and 10Hz high-pass filters respectively.

635 Mice were recorded in light and temperature-controlled rooms, for 8-hours, at the same  
636 time of day for every mouse. The first hour of recording was considered the acclimation period  
637 and was therefore excluded from final analysis. Food and water were available *ad libitum*  
638 throughout the recording day.

### 639 **Sleep scoring and analysis of sleep data**

640 Sleep was automatically scored offline via SPINDLE<sup>74</sup>. For spectral frequency analysis of  
641 ECoG and EMG activity, raw files were also pre-processed in MATLAB (MathWorks) using the  
642 free toolkit EEGLAB (UC San Diego). Scored files were downloaded from SPINDLE as a .csv  
643 and statistical analysis was performed in R v4.1.2. Only ECoG spectral power from frontal cortex  
644 is discussed in depth, as the spectral power from parietal cortex was the same between all groups  
645 for all frequency bands: Delta: one-way ANOVA,  $F = 0.031$ ,  $p = 0.97$ , Theta: one-way ANOVA,  
646  $F = 0.663$ ,  $p = 0.524$ , Alpha: one-way ANOVA,  $F = 0.327$ ,  $p = 0.724$ , Beta: one-way ANOVA,  $F$   
647  $= 0.079$ ,  $p = 0.924$ , Gamma: one-way ANOVA,  $F = 0.483$ ,  $p = 0.622$ .

### 648 **Data analysis and statistics**

649 Data are presented as mean  $\pm$  SEM and analyzed as a one-way ANOVA followed by  
650 Tukey’s Honest Significant Difference test for post-hoc comparisons or a repeated measures two-  
651 way ANOVA with Bonferroni correction for multiple comparisons.  $p < 0.05$  was considered as  
652 statistically significant. All statistical analyses were performed using R v4.1.2.

653 **Data availability**

654 All data generated or analyzed in this study are included in the manuscript and supporting files.

655 **References**

- 656 1. Corp, D. T. *et al.* Network localization of cervical dystonia based on causal brain lesions.  
657 *Brain* **142**, 1660–1674 (2019).
- 658 2. Fremont, R., Tewari, A., Angueyra, C. & Khodakhah, K. A role for cerebellum in the  
659 hereditary dystonia DYT1. *eLife* **6**, e22775 (2017).
- 660 3. Campbell, D. B., North, J. B. & Hess, E. J. Tottering Mouse Motor Dysfunction Is  
661 Abolished on the Purkinje Cell Degeneration (pcd) Mutant Background. *Exp. Neurol.* **160**,  
662 268–278 (1999).
- 663 4. White, J. J. & Sillitoe, R. V. Genetic silencing of olivocerebellar synapses causes dystonia-  
664 like behaviour in mice. *Nat. Commun.* **8**, 14912 (2017).
- 665 5. van der Heijden, M. E. *et al.* Abnormal cerebellar function and tremor in a mouse model for  
666 non-manifesting partially penetrant dystonia type 6. *J. Physiol.* **599**, 2037–2054 (2021).
- 667 6. Fremont, R., Tewari, A. & Khodakhah, K. Aberrant Purkinje cell activity is the cause of  
668 dystonia in a shRNA-based mouse model of Rapid Onset Dystonia-Parkinsonism.  
669 *Neurobiol. Dis.* **82**, 200–212 (2015).
- 670 7. Washburn, S., Fremont, R., Moreno-Escobar, M. C., Angueyra, C. & Khodakhah, K. Acute  
671 cerebellar knockdown of *Sgce* reproduces salient features of myoclonus-dystonia (DYT11)  
672 in mice. *eLife* **8**, e52101 (2019).
- 673 8. Brown, E. G. *et al.* Cerebellar Deep Brain Stimulation for Acquired Hemidystonia. *Mov.*  
674 *Disord. Clin. Pract.* **7**, 188–193 (2020).
- 675 9. Horisawa, S. *et al.* Case Report: Deep Cerebellar Stimulation for Tremor and Dystonia.  
676 *Front. Neurol.* **12**, (2021).
- 677 10. Popa, L. S., Hewitt, A. L. & Ebner, T. J. The cerebellum for jocks and nerds alike. *Front.*  
678 *Syst. Neurosci.* **8**, (2014).

- 679 11. Larry, N., Yarkoni, M., Lixenberg, A. & Joshua, M. Cerebellar climbing fibers encode  
680 expected reward size. *eLife* **8**, e46870.
- 681 12. Carta, I., Chen, C. H., Schott, A. L., Dorizan, S. & Khodakhah, K. Cerebellar modulation of  
682 the reward circuitry and social behavior. *Science* **363**, eaav0581 (2019).
- 683 13. Zhang, L.-B. *et al.* Neuronal Activity in the Cerebellum During the Sleep-Wakefulness  
684 Transition in Mice. *Neurosci. Bull.* **36**, 919–931 (2020).
- 685 14. Mano, N. Changes of simple and complex spike activity of cerebellar purkinje cells with  
686 sleep and waking. *Science* **170**, 1325–1327 (1970).
- 687 15. McCarley, R. W. & Hobson, J. A. Simple spike firing patterns of cat cerebellar Purkinje  
688 cells in sleep and waking. *Electroencephalogr. Clin. Neurophysiol.* **33**, 471–483 (1972).
- 689 16. Dang-Vu, T. T. *et al.* Spontaneous neural activity during human slow wave sleep. *Proc.*  
690 *Natl. Acad. Sci.* **105**, 15160–15165 (2008).
- 691 17. Cunchillos, J. D. & De Andrés, I. Participation of the cerebellum in the regulation of the  
692 sleep-wakefulness cycle. Results in cerebellectomized cats. *Electroencephalogr. Clin.*  
693 *Neurophysiol.* **53**, 549–558 (1982).
- 694 18. De Andrés, I., Garzón, M. & Reinoso-Suárez, F. Functional Anatomy of Non-REM Sleep.  
695 *Front. Neurol.* **2**, (2011).
- 696 19. Song, B. & Zhu, J.-C. A Narrative Review of Cerebellar Malfunctions and Sleep  
697 Disturbances. *Front. Neurosci.* **15**, 590619 (2021).
- 698 20. Bradnam, L. V., Meiring, R. M., Boyce, M. & McCambridge, A. Neurorehabilitation in  
699 dystonia: a holistic perspective. *J. Neural Transm.* **128**, 549–558 (2021).
- 700 21. Yang, J. *et al.* Nonmotor symptoms in primary adult-onset cervical dystonia and  
701 blepharospasm. *Brain Behav.* **7**, e00592 (2016).

- 702 22. Duane, D. D. & Bakken, E. C. Additional clinical observations on psychiatric disorders in  
703 adult-onset focal dystonia: a case control study. *Mov. Disord. Off. J. Mov. Disord. Soc.* **26**,  
704 1572; author reply 1573 (2011).
- 705 23. Antelmi, E. *et al.* Modulation of the Muscle Activity During Sleep in Cervical Dystonia.  
706 *Sleep* **40**, zsx088 (2017).
- 707 24. Smith, B. *Lived Experience with Dystonia*. 633  
708 [https://dystoniasurveys.files.wordpress.com/2021/08/lived-experience-dystonia-patient-](https://dystoniasurveys.files.wordpress.com/2021/08/lived-experience-dystonia-patient-surveys-2020-2021.pdf)  
709 [surveys-2020-2021.pdf](https://dystoniasurveys.files.wordpress.com/2021/08/lived-experience-dystonia-patient-surveys-2020-2021.pdf) (2021).
- 710 25. Silvestri, R. *et al.* The effect of nocturnal physiological sleep on various movement  
711 disorders. *Mov. Disord. Off. J. Mov. Disord. Soc.* **5**, 8–14 (1990).
- 712 26. Eichenseer, S. R., Stebbins, G. T. & Comella, C. L. Beyond a motor disorder: A prospective  
713 evaluation of sleep quality in cervical dystonia. *Parkinsonism Relat. Disord.* **20**, 405–408  
714 (2014).
- 715 27. Boudreau, P., Dumont, G. A. & Boivin, D. B. Circadian adaptation to night shift work  
716 influences sleep, performance, mood and the autonomic modulation of the heart. *PLoS One*  
717 **8**, e70813 (2013).
- 718 28. Pimenta, A. M., Kac, G., Souza, R. R. C. E., Ferreira, L. M. de B. A. & Silqueira, S. M. de  
719 F. Night-shift work and cardiovascular risk among employees of a public university. *Rev.*  
720 *Assoc. Medica Bras.* **1992** **58**, 168–177 (2012).
- 721 29. Al-Sharman, A. & Siengsukon, C. F. Sleep Enhances Learning of a Functional Motor Task  
722 in Young Adults. *Phys. Ther.* **93**, 1625–1635 (2013).
- 723 30. Walker, M. P. *et al.* Sleep and the Time Course of Motor Skill Learning. *Learn. Mem.* **10**,  
724 275–284 (2003).

- 725 31. De Zeeuw, C. I. & Canto, C. B. Sleep deprivation directly following eyeblink-conditioning  
726 impairs memory consolidation. *Neurobiol. Learn. Mem.* **170**, 107165 (2020).
- 727 32. Tononi, G. & Cirelli, C. Sleep and the Price of Plasticity: From Synaptic and Cellular  
728 Homeostasis to Memory Consolidation and Integration. *Neuron* **81**, 12–34 (2014).
- 729 33. Song, J., Xu, Y., Hu, X., Choi, B. & Tong, Q. Brain Expression of Cre Recombinase Driven  
730 by Pancreas-Specific Promoters. *Genes. N. Y. N 2000* **48**, 628–634 (2010).
- 731 34. Elizabeth Lackey. Neural function of Cerebellar inputs in Dystonia-like behavior. (Baylor  
732 College of Medicine, 2022).
- 733 35. Go, S. A., Coleman-Wood, K. & Kaufman, K. R. Frequency analysis of lower extremity  
734 electromyography signals for the quantitative diagnosis of dystonia. *J. Electromyogr.*  
735 *Kinesiol. Off. J. Int. Soc. Electrophysiol. Kinesiol.* **24**, 31–36 (2014).
- 736 36. Eckel-Mahan, K. & Sassone-Corsi, P. Phenotyping Circadian Rhythms in Mice. *Curr.*  
737 *Protoc. Mouse Biol.* **5**, 271–281 (2015).
- 738 37. Mendoza, J., Pévet, P., Felder-Schmittbuhl, M.-P., Bailly, Y. & Challet, E. The Cerebellum  
739 Harbors a Circadian Oscillator Involved in Food Anticipation. *J. Neurosci.* **30**, 1894–1904  
740 (2010).
- 741 38. Stowie, A. C. & Glass, J. D. Longitudinal Study of Changes in Daily Activity Rhythms  
742 over the Lifespan in Individual Male and Female C57BL/6J Mice. *J. Biol. Rhythms* **30**,  
743 563–568 (2015).
- 744 39. Abrahamson, E. E. & Moore, R. Y. Suprachiasmatic nucleus in the mouse: retinal  
745 innervation, intrinsic organization and efferent projections. *Brain Res.* **916**, 172–191  
746 (2001).

- 747 40. Caverzasio, S. *et al.* Brain plasticity and sleep: Implication for movement disorders.  
748 *Neurosci. Biobehav. Rev.* **86**, 21–35 (2018).
- 749 41. Hunsley, M. S. & Palmiter, R. D. Altered sleep latency and arousal regulation in mice  
750 lacking norepinephrine. *Pharmacol. Biochem. Behav.* **78**, 765–773 (2004).
- 751 42. BJORNESS, T. E., BOOTH, V. & POE, G. R. Hippocampal theta power pressure builds  
752 over non-REM sleep and dissipates within REM sleep episodes. *Arch. Ital. Biol.* **156**, 112–  
753 126 (2018).
- 754 43. Long, S. *et al.* Sleep Quality and Electroencephalogram Delta Power. *Front. Neurosci.* **15**,  
755 (2021).
- 756 44. Torres-Herraez, A., Watson, T. & Rondi-Reig, L. Delta oscillations coordinate intra-  
757 cerebellar and cerebello-hippocampal network dynamics during sleep. *J. Neurosci.* **42**,  
758 2268–2281 (2022).
- 759 45. Frank, M. G. Sleep and synaptic plasticity in the developing and adult brain. *Curr. Top.*  
760 *Behav. Neurosci.* **25**, 123–149 (2015).
- 761 46. Loschky, S. S. *et al.* Ultrastructural effects of sleep and wake on the parallel fiber synapses  
762 of the cerebellum. *eLife* **11**, e84199 (2022).
- 763 47. Kim, J. E. *et al.* Cerebellar 5HT-2A receptor mediates stress-induced onset of dystonia. *Sci.*  
764 *Adv.* (2021) doi:10.1126/sciadv.abb5735.
- 765 48. Smit, M. *et al.* Fatigue, Sleep Disturbances, and Their Influence on Quality of Life in  
766 Cervical Dystonia Patients. *Mov. Disord. Clin. Pract.* **4**, 517–523 (2017).
- 767 49. Salazar Leon, L. E. & Sillitoe, R. V. Potential Interactions Between Cerebellar Dysfunction  
768 and Sleep Disturbances in Dystonia. *Dystonia* **0**, (2022).



- 769 50. Van Dort, C. J. *et al.* Optogenetic activation of cholinergic neurons in the PPT or LDT  
770 induces REM sleep. *Proc. Natl. Acad. Sci. U. S. A.* **112**, 584–589 (2015).
- 771 51. Fujiyama, T. *et al.* Forebrain Ptf1a Is Required for Sexual Differentiation of the Brain. *Cell*  
772 *Rep.* **24**, 79–94 (2018).
- 773 52. Whitney, M. S. *et al.* Adult Brain Serotonin Deficiency Causes Hyperactivity, Circadian  
774 Disruption, and Elimination of Siestas. *J. Neurosci. Off. J. Soc. Neurosci.* **36**, 9828–9842  
775 (2016).
- 776 53. Collins, B. *et al.* Circadian VIPergic Neurons of the Suprachiasmatic Nuclei Sculpt the  
777 Sleep-Wake Cycle. *Neuron* **108**, 486-499.e5 (2020).
- 778 54. Adamantidis, A. R., Zhang, F., Aravanis, A. M., Deisseroth, K. & de Lecea, L. Neural  
779 substrates of awakening probed with optogenetic control of hypocretin neurons. *Nature*  
780 **450**, 420–424 (2007).
- 781 55. Patel, A. K., Reddy, V., Shumway, K. R. & Araujo, J. F. Physiology, Sleep Stages. in  
782 *StatPearls* (StatPearls Publishing, 2022).
- 783 56. Eban-Rothschild, A., Rothschild, G., Giardino, W. J., Jones, J. R. & de Lecea, L. VTA  
784 dopaminergic neurons regulate ethologically relevant sleep–wake behaviors. *Nat. Neurosci.*  
785 **19**, 1356–1366 (2016).
- 786 57. Medeiros, D. de C., Lopes Aguiar, C., Moraes, M. F. D. & Fisone, G. Sleep Disorders in  
787 Rodent Models of Parkinson’s Disease. *Front. Pharmacol.* **10**, 1414 (2019).
- 788 58. Lydic, R. The Motor Atonia of REM Sleep: A Critical Topics Forum. *Sleep* **31**, 1471–1472  
789 (2008).

- 790 59. Swift, K. M. *et al.* Abnormal Locus Coeruleus Sleep Activity Alters Sleep Signatures of  
791 Memory Consolidation and Impairs Place Cell Stability and Spatial Memory. *Curr. Biol.*  
792 **28**, 3599-3609.e4 (2018).
- 793 60. Hoffer, B. J., Siggins, G. R., Oliver, A. P. & Bloom, F. E. Activation of the Pathway from  
794 Locus Coeruleus to Rat Cerebellar Purkinje Neurons: Pharmacological Evidence of  
795 Noradrenergic Central Inhibition. *J. Pharmacol. Exp. Ther.* **184**, 553–569 (1973).
- 796 61. Moises, H. C., Waterhouse, B. D. & Woodward, D. J. Locus coeruleus stimulation  
797 potentiates Purkinje cell responses to afferent input: the climbing fiber system. *Brain Res.*  
798 **222**, 43–64 (1981).
- 799 62. Schwarz, L. A. *et al.* Viral-genetic tracing of the input–output organization of a central  
800 norepinephrine circuit. *Nature* **524**, 88–92 (2015).
- 801 63. Romigi, A. *et al.* Pedunculopontine nucleus stimulation influences REM sleep in  
802 Parkinson’s disease. *Eur. J. Neurol.* **15**, e64-65 (2008).
- 803 64. French, I. T. & Muthusamy, K. A. A Review of the Pedunculopontine Nucleus in  
804 Parkinson’s Disease. *Front. Aging Neurosci.* **10**, (2018).
- 805 65. Liu, S. *et al.* EEG Power Spectral Analysis of Abnormal Cortical Activations During  
806 REM/NREM Sleep in Obstructive Sleep Apnea. *Front. Neurol.* **12**, (2021).
- 807 66. Mihajlovic, V., Patki, S. & Grundlehner, B. The impact of head movements on EEG and  
808 contact impedance: an adaptive filtering solution for motion artifact reduction. *Annu. Int.*  
809 *Conf. IEEE Eng. Med. Biol. Soc. IEEE Eng. Med. Biol. Soc. Annu. Int. Conf.* **2014**, 5064–  
810 5067 (2014).
- 811 67. Liu, Y. *et al.* Loss of cerebellar function selectively affects intrinsic rhythmicity of eupneic  
812 breathing. *Biol. Open* **9**, bio048785 (2020).

- 813 68. Canto, C. B., Onuki, Y., Bruinsma, B., Werf, Y. D. van der & Zeeuw, C. I. D. The Sleeping  
814 Cerebellum. *Trends Neurosci.* **40**, 309–323 (2017).
- 815 69. Brankack, J., Kukushka, V. I., Vyssotski, A. L. & Draguhn, A. EEG gamma frequency and  
816 sleep-wake scoring in mice: comparing two types of supervised classifiers. *Brain Res.*  
817 **1322**, 59–71 (2010).
- 818 70. Valderrama, M. *et al.* Human Gamma Oscillations during Slow Wave Sleep. *PLoS ONE* **7**,  
819 e33477 (2012).
- 820 71. Zhou, J. *et al.* Purkinje cell neurotransmission patterns cerebellar basket cells into zonal  
821 modules defined by distinct pinceau sizes. *eLife* **9**, e55569.
- 822 72. Sillitoe, R. V., Künzle, H. & Hawkes, R. Zebrin II compartmentation of the cerebellum in a  
823 basal insectivore, the Madagascan hedgehog tenrec *Echinops telfairi*. *J. Anat.* **203**, 283–296  
824 (2003).
- 825 73. White, J. J. & Sillitoe, R. V. Postnatal development of cerebellar zones revealed by  
826 neurofilament heavy chain protein expression. *Front. Neuroanat.* **7**, 9 (2013).
- 827 74. Miladinović, Đ. *et al.* SPINDLE: End-to-end learning from EEG/EMG to extrapolate  
828 animal sleep scoring across experimental settings, labs and species. *PLOS Comput. Biol.*  
829 **15**, e1006968 (2019).

830

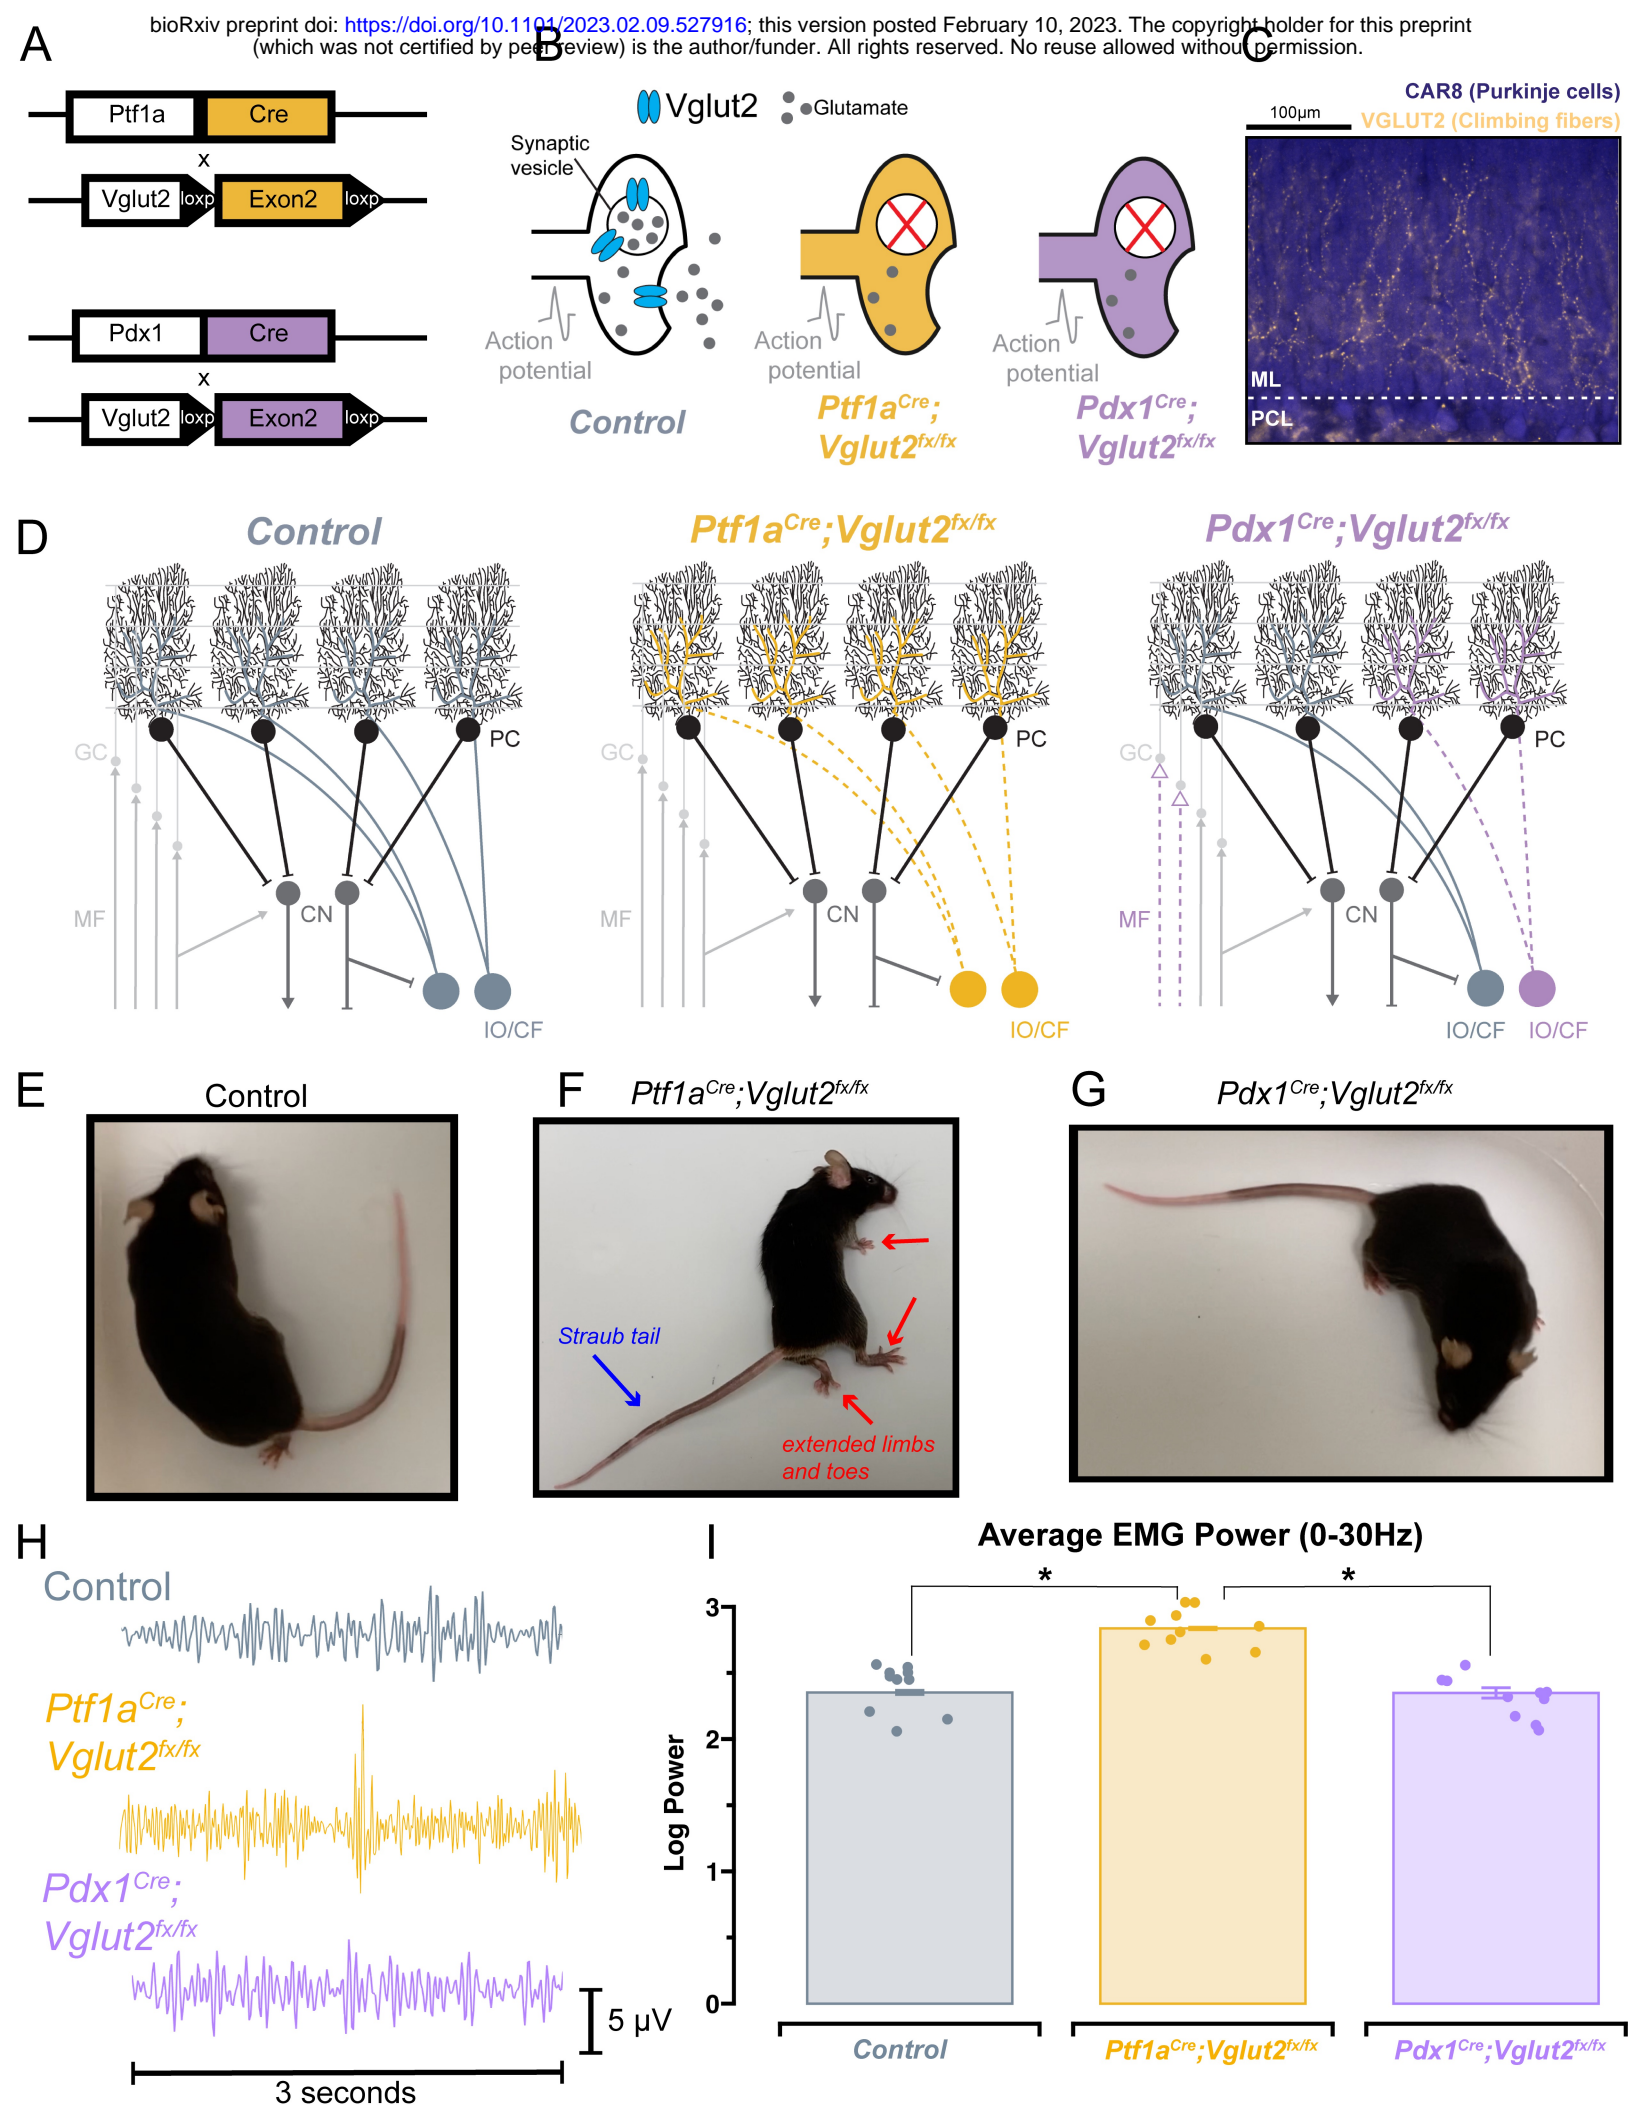

**A**

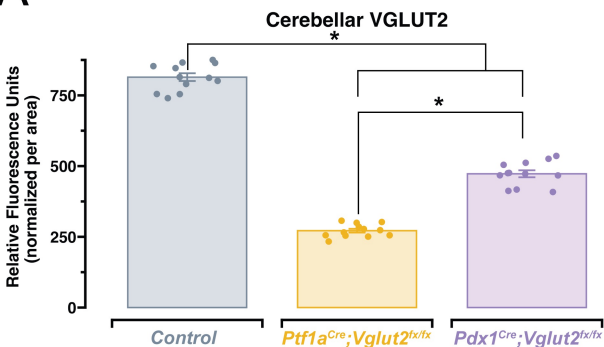

**B**

*Control*

CAR8/IP3R1 (Purkinje cells)  
VGLUT2 (Climbing fibers)

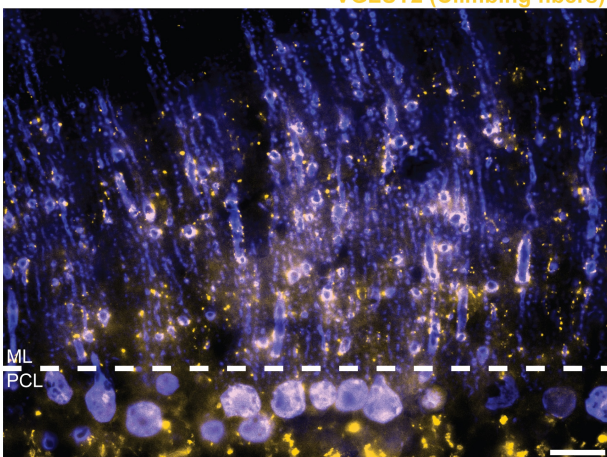

**C**

*Ptf1a<sup>Cre</sup>;Vglut2<sup>fx/fx</sup>*

CAR8/IP3R1 (Purkinje cells)  
VGLUT2 (Climbing fibers)

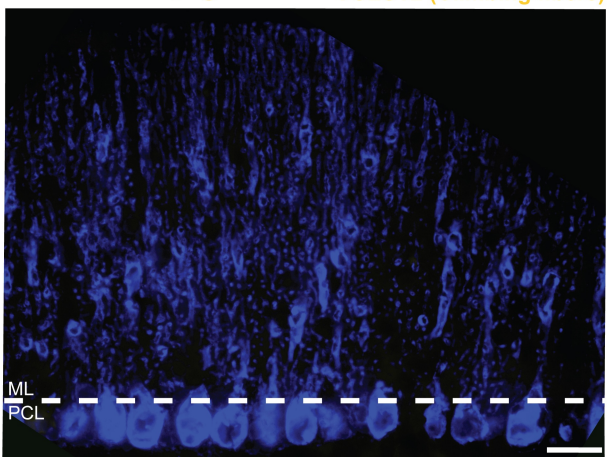

**D**

*Pdx1<sup>Cre</sup>;Vglut2<sup>fx/fx</sup>*

CAR8/IP3R1 (Purkinje cells)  
VGLUT2 (Climbing fibers)

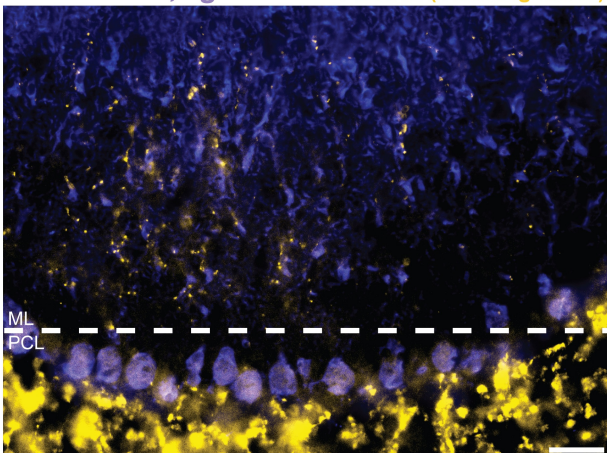

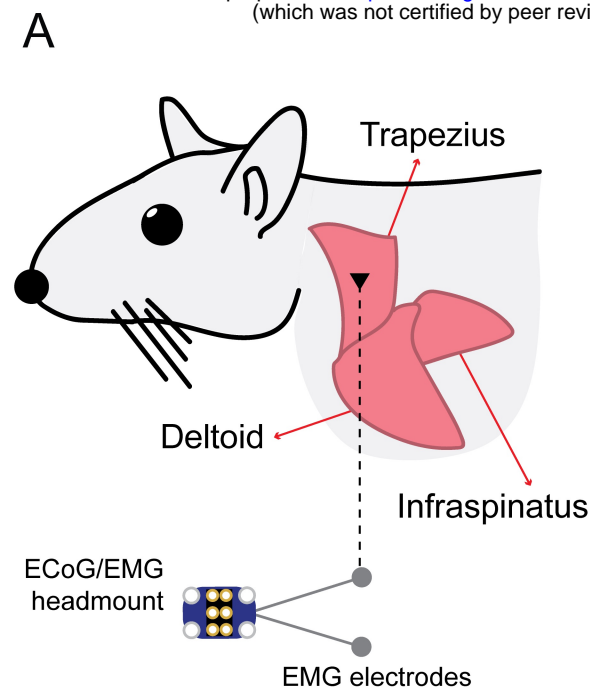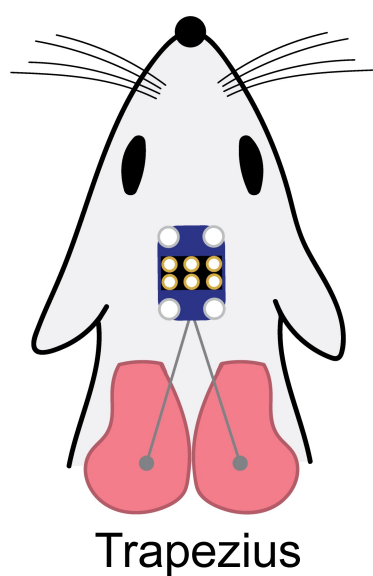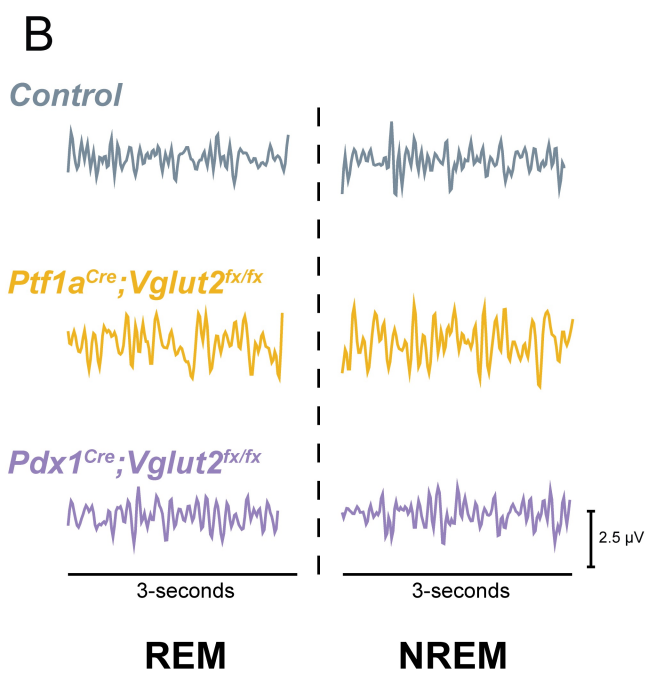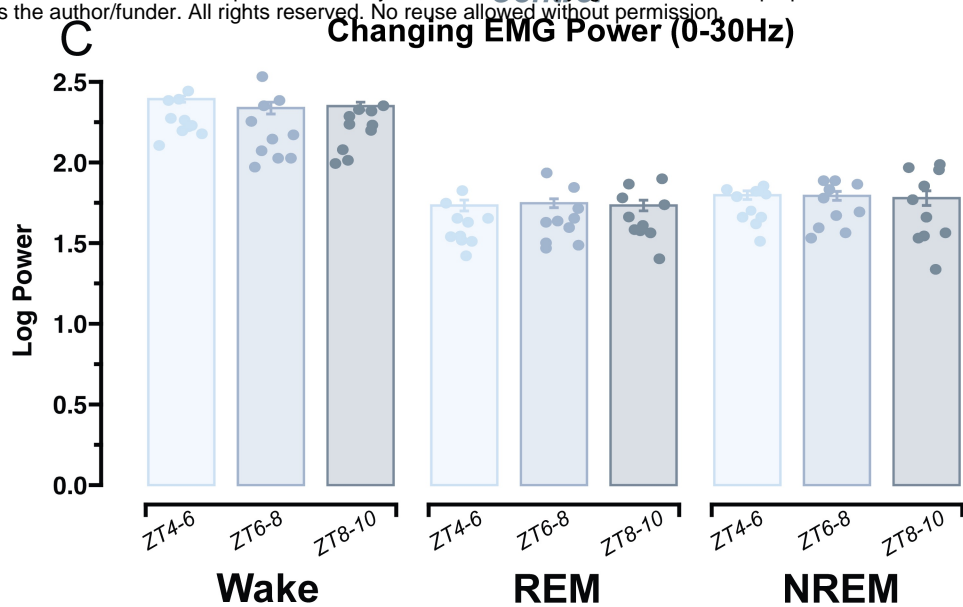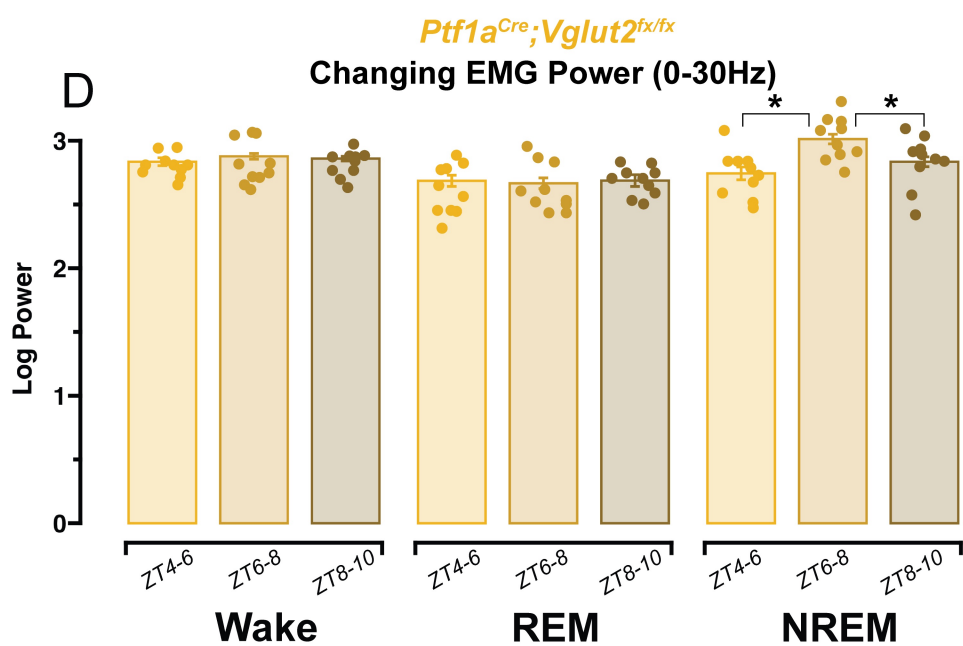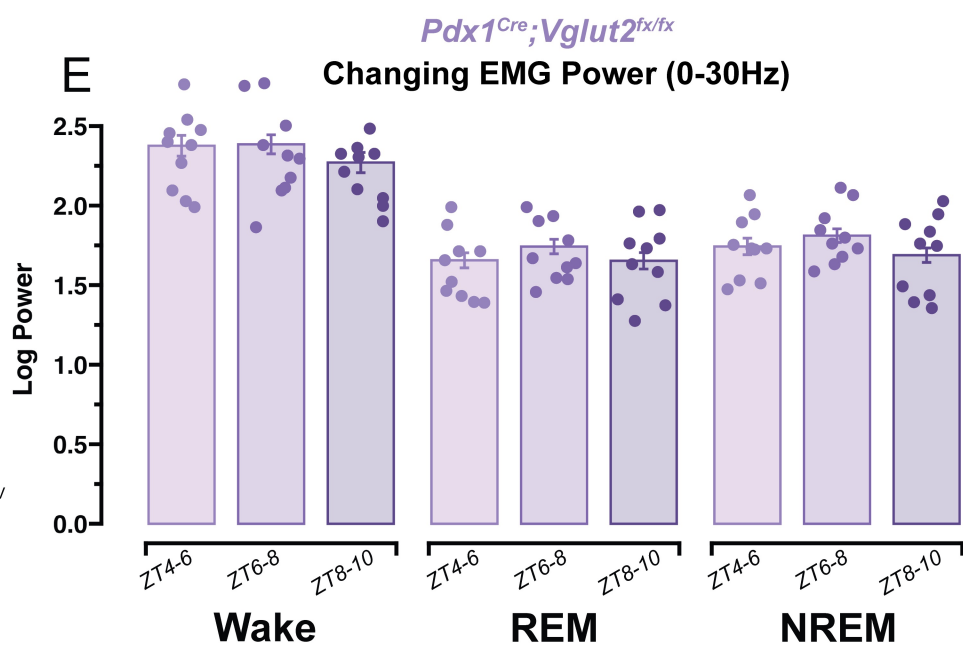

**A**

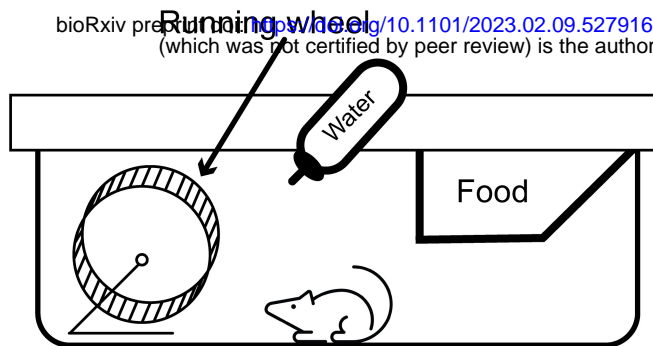

**C**

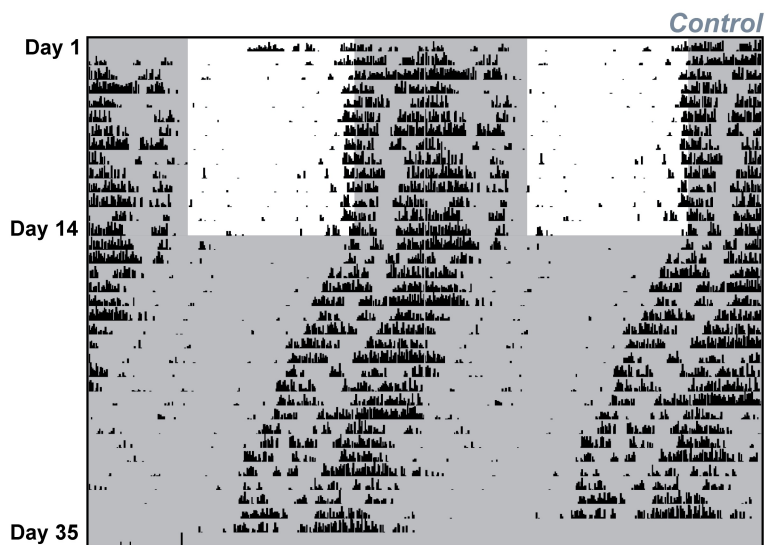

**D**

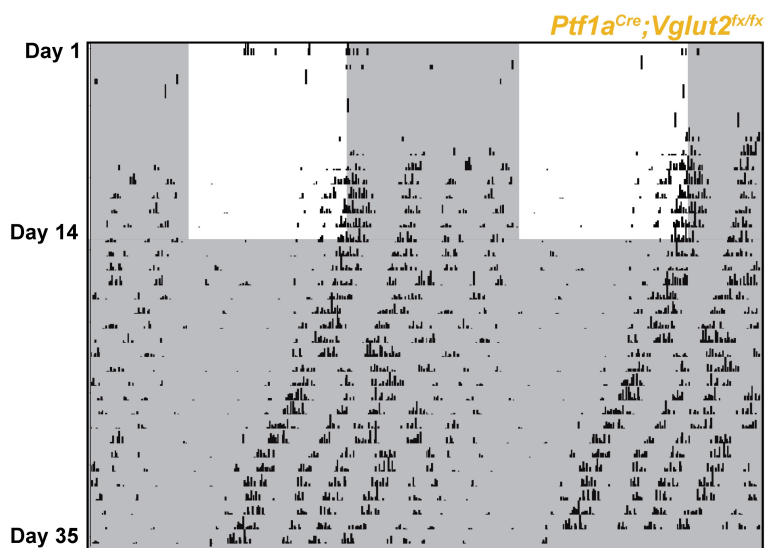

**E**

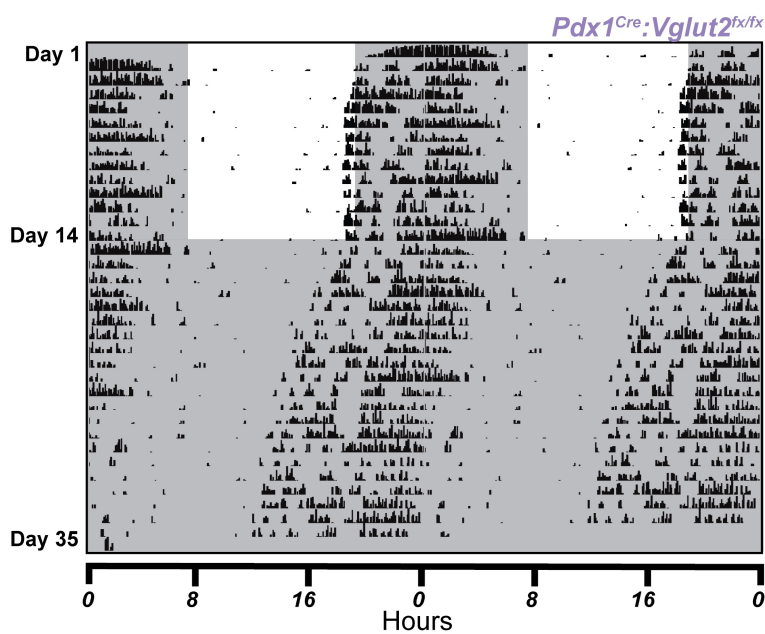

**B**

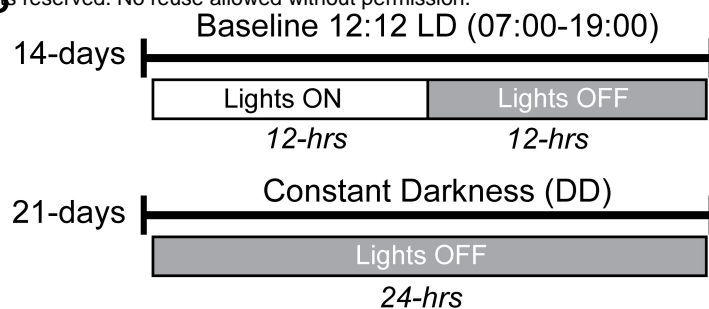

**F**

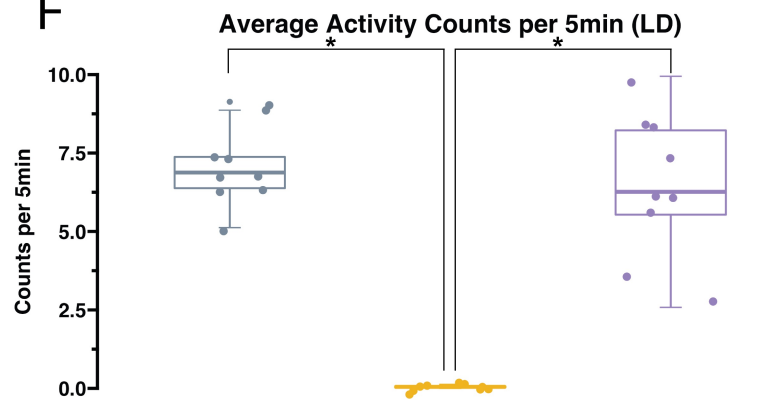

**G**

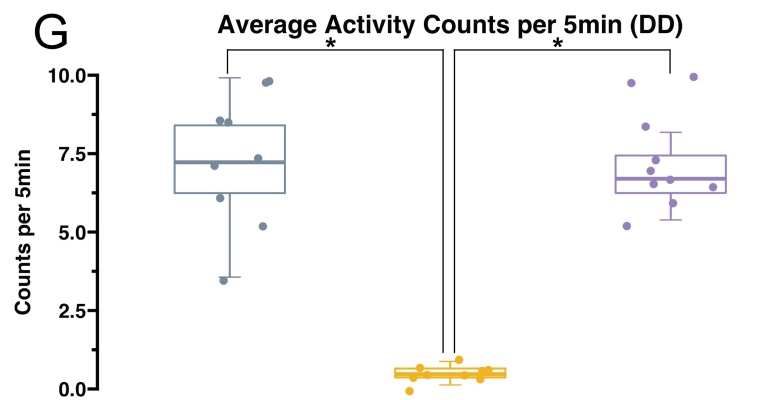

**H**

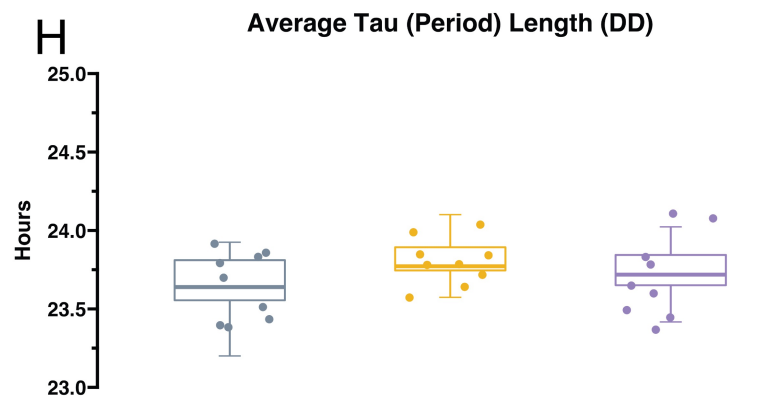

**I**

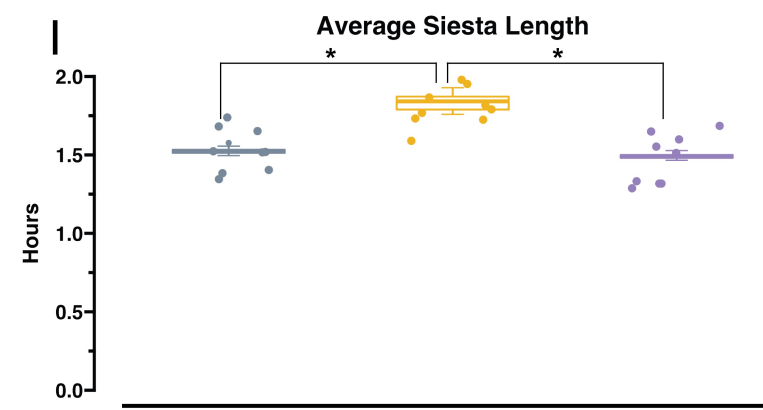

# Sagittal Mouse Brain

A

- Master circadian clock
- Intermediate circadian regions (between SCN and Cerebellum)

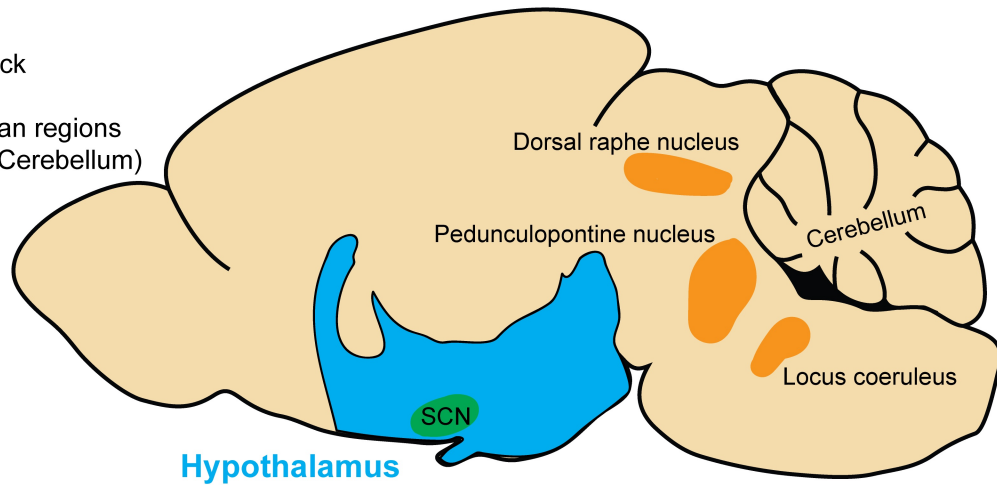

B

*Ptf1a*<sup>Cre+/-</sup>; *Vglut2*<sup>+/+</sup>

*Vglut2* mRNA

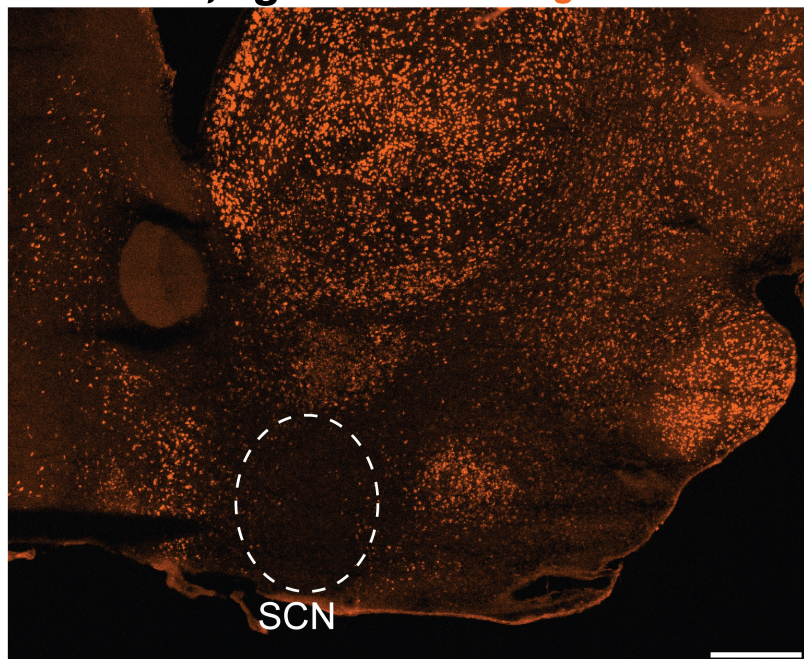

*Pdx1*<sup>Cre+/-</sup>; *Vglut2*<sup>+/+</sup>

*Vglut2* mRNA

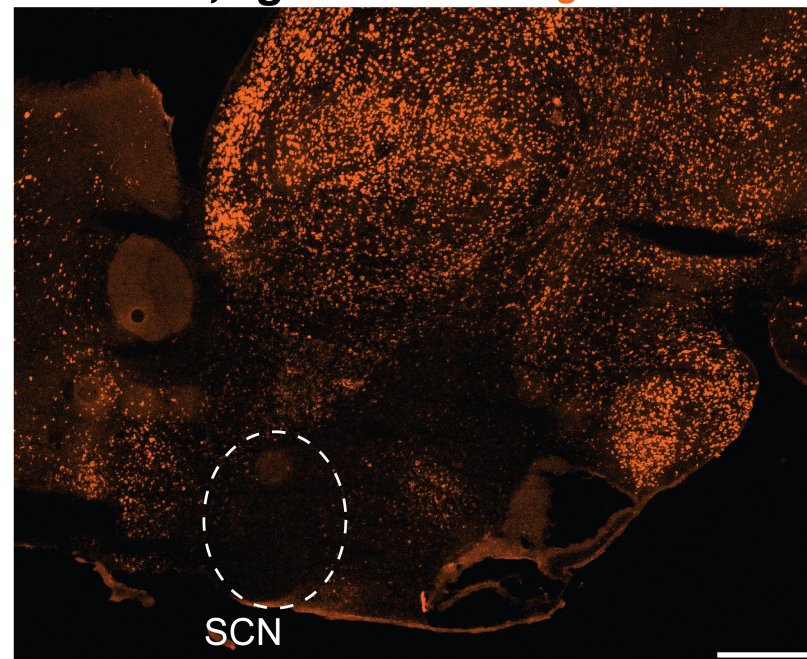

C

*Ptf1a*<sup>Cre+/-</sup>; *Vglut2*<sup>+/+</sup>

*Vgat* mRNA

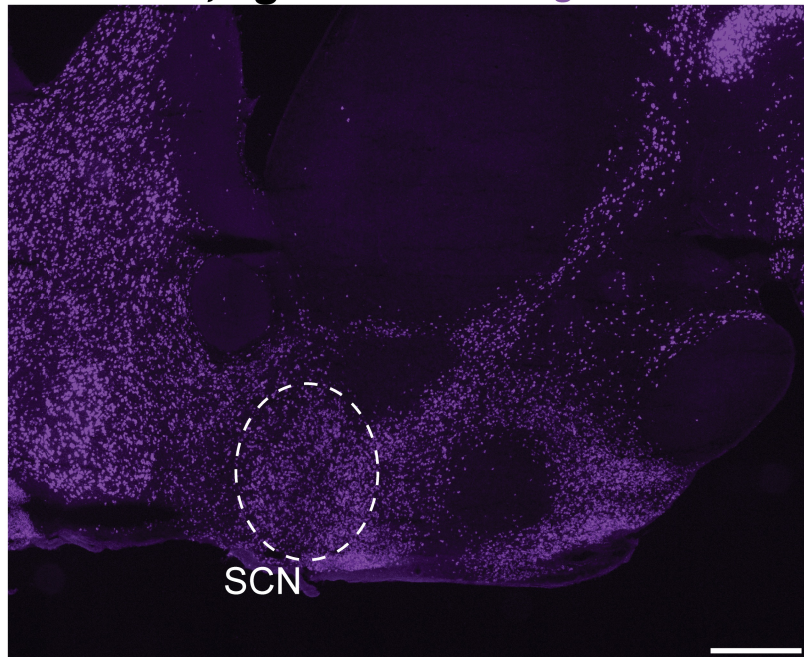

*Pdx1*<sup>Cre+/-</sup>; *Vglut2*<sup>+/+</sup>

*Vgat* mRNA

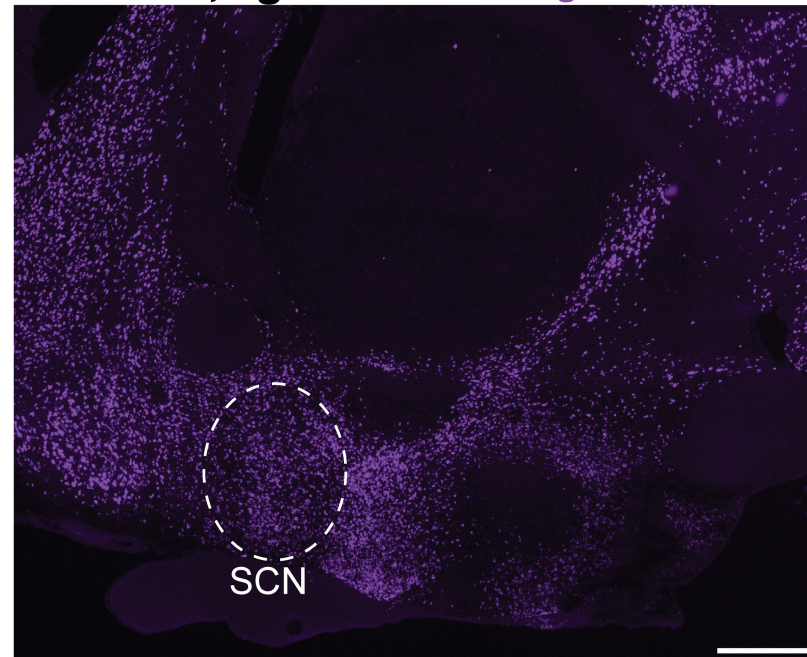



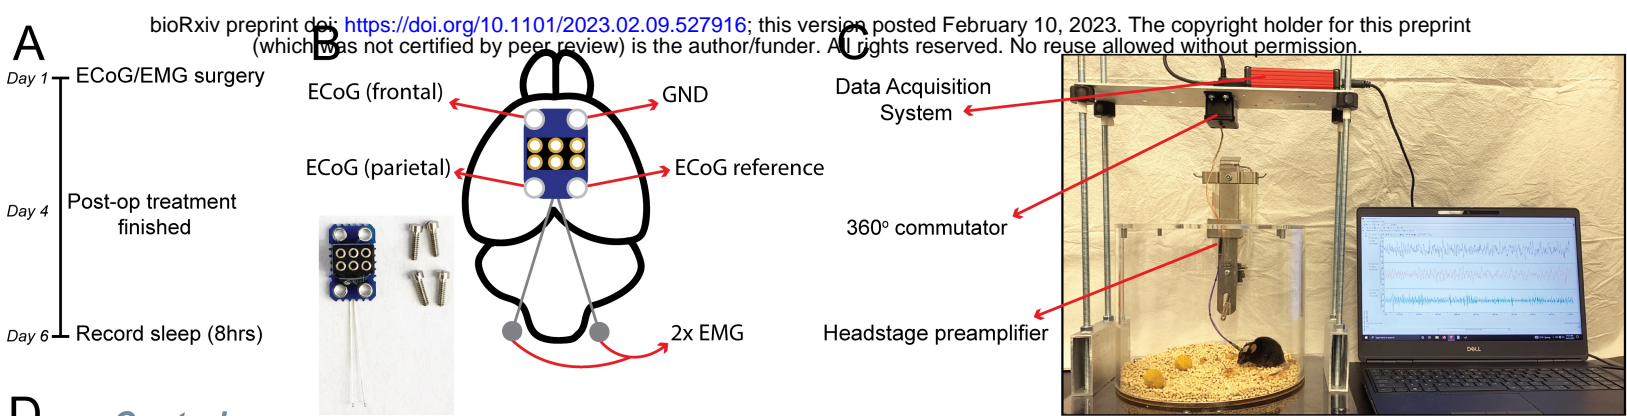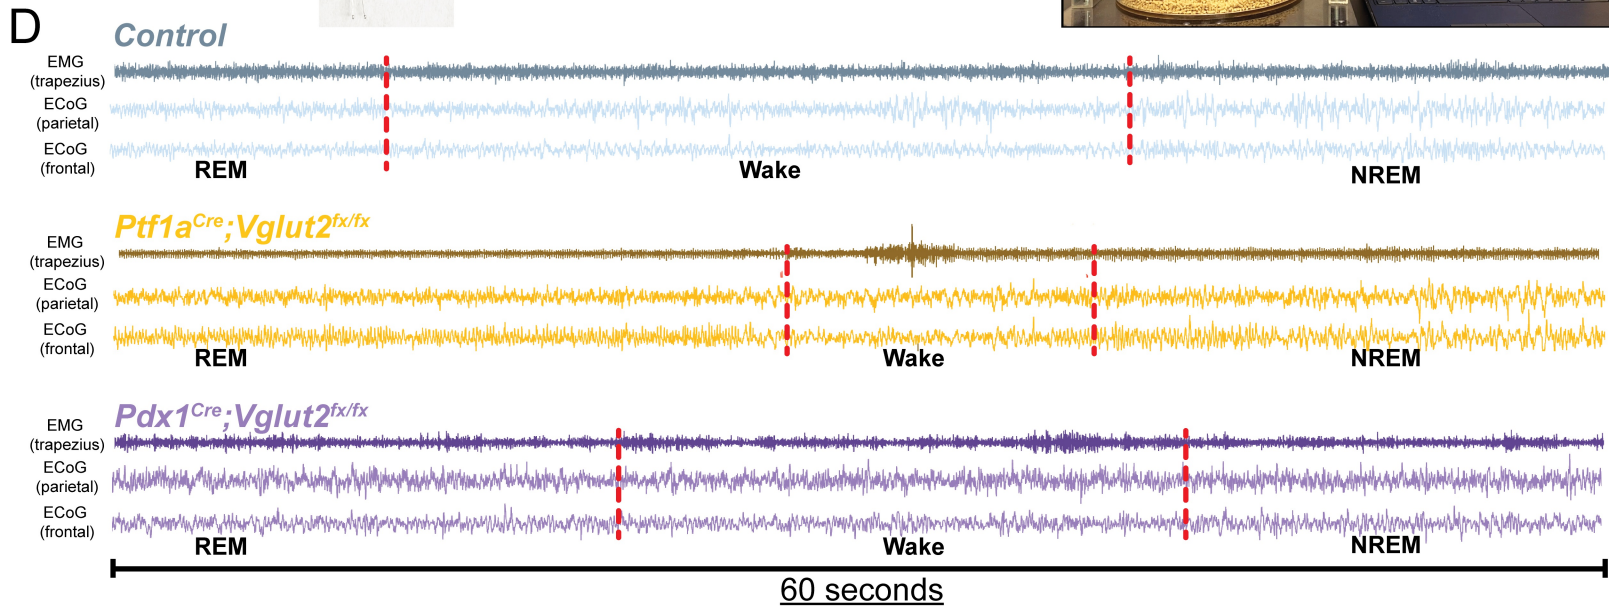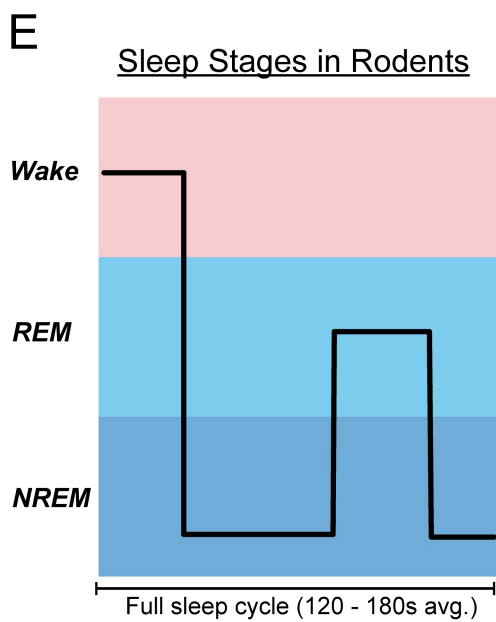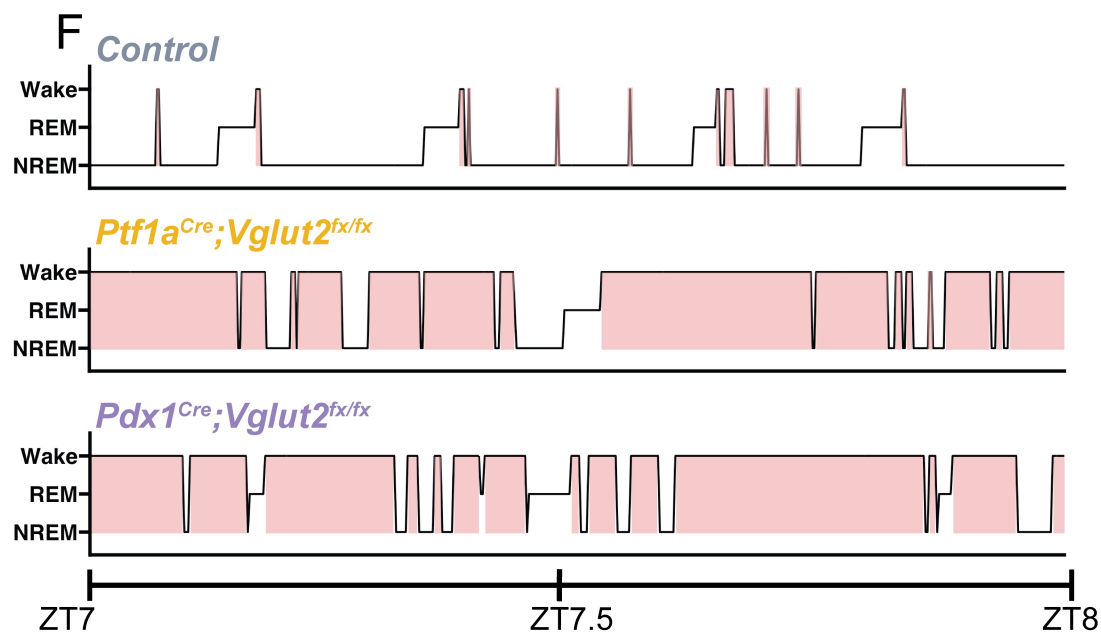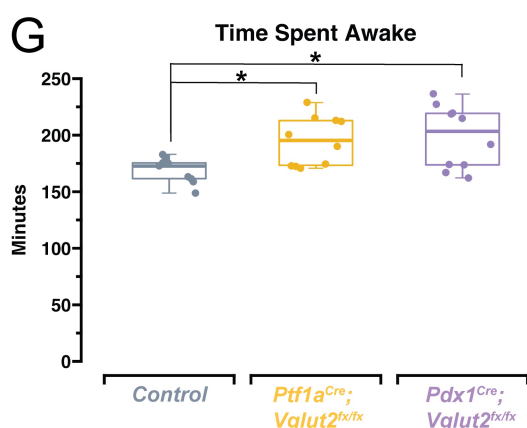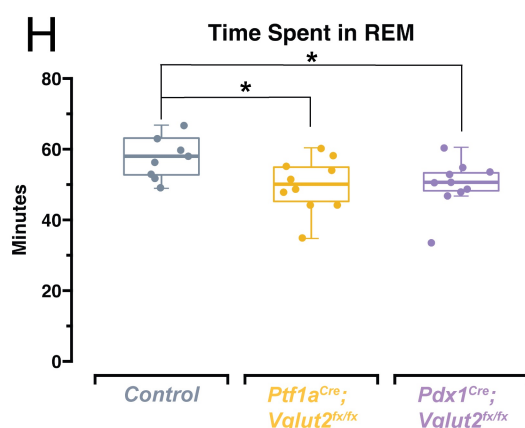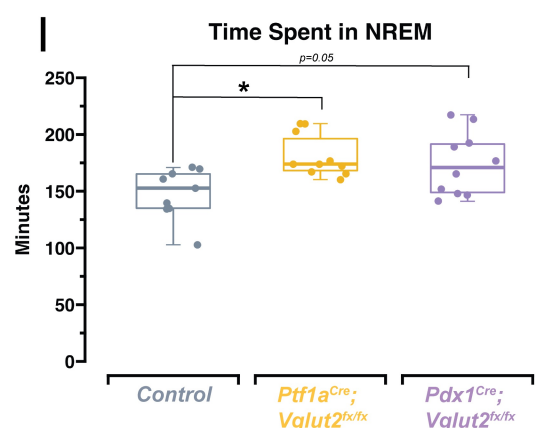

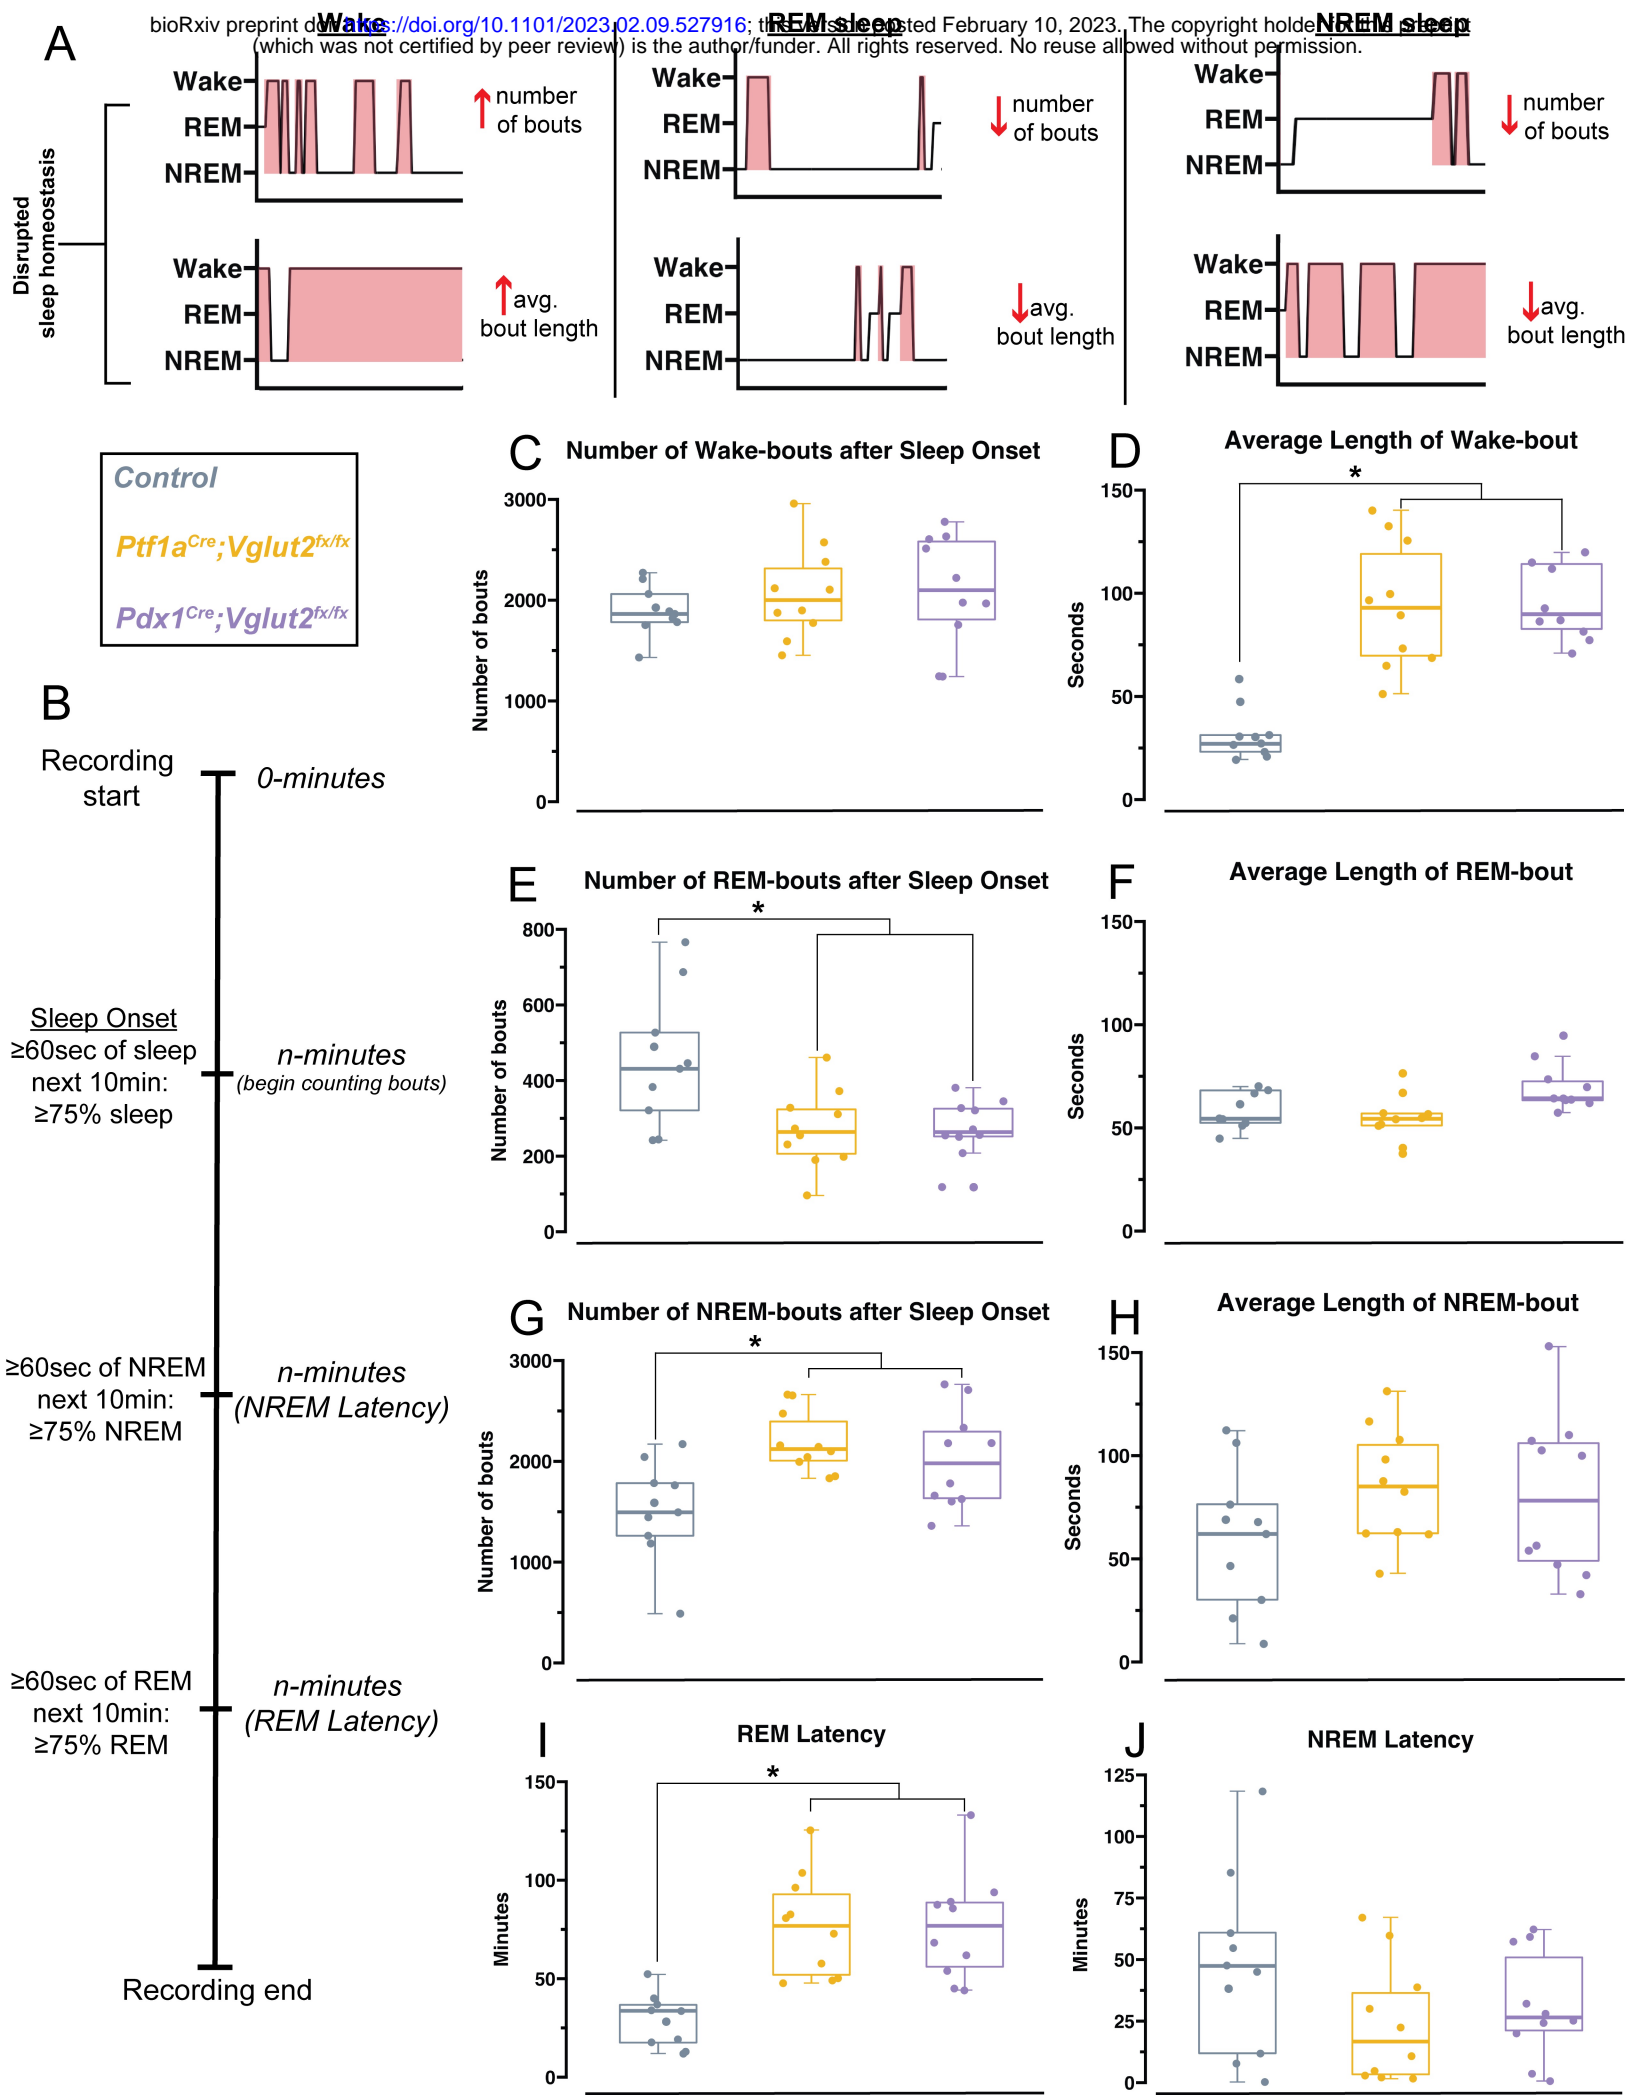

# Sleepstate dependent ECG waveforms

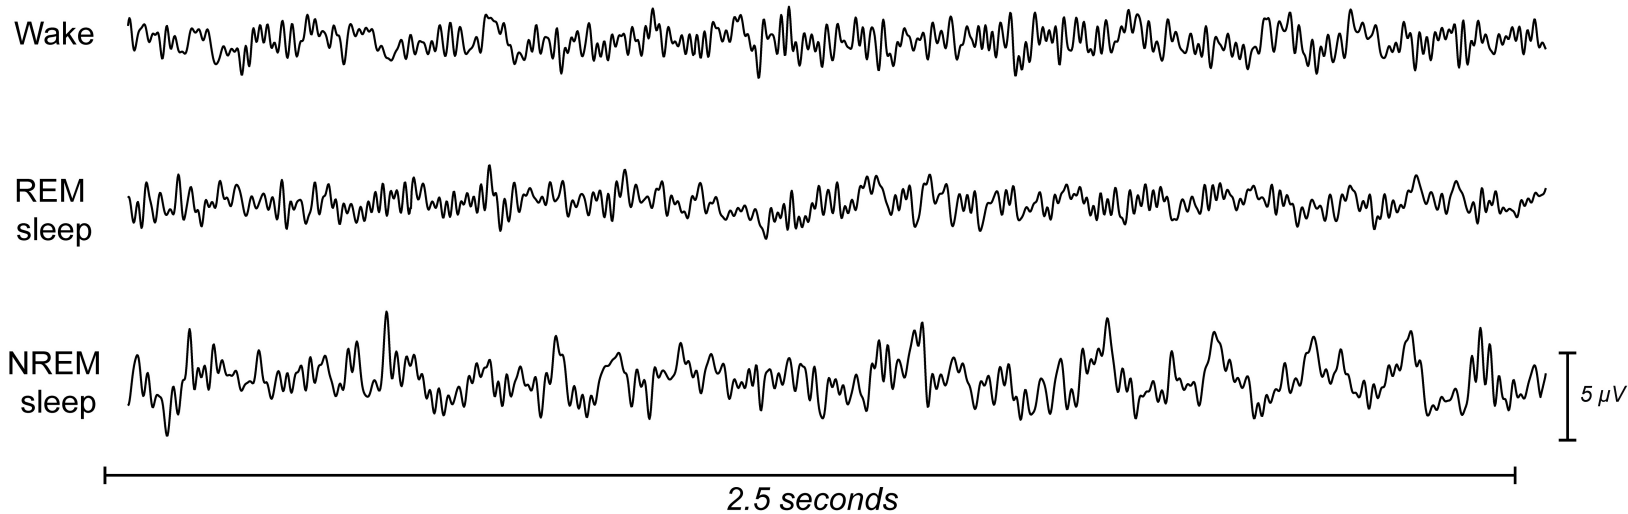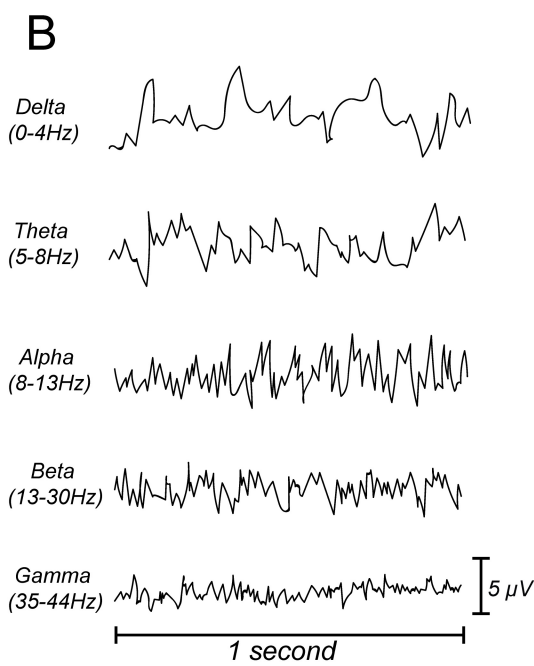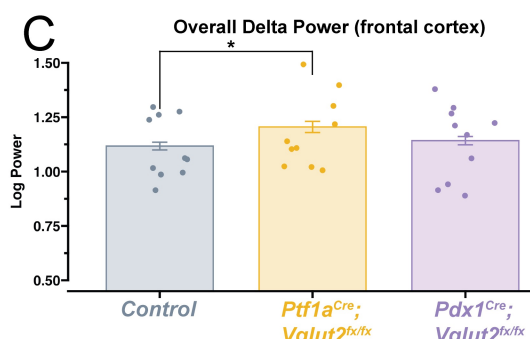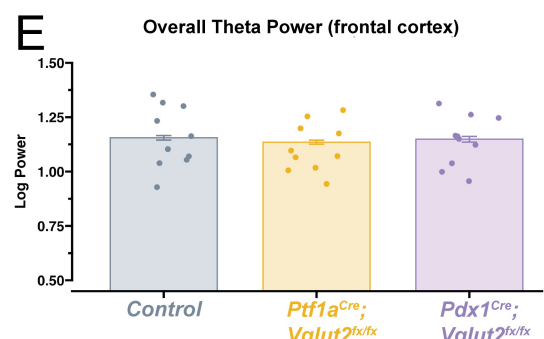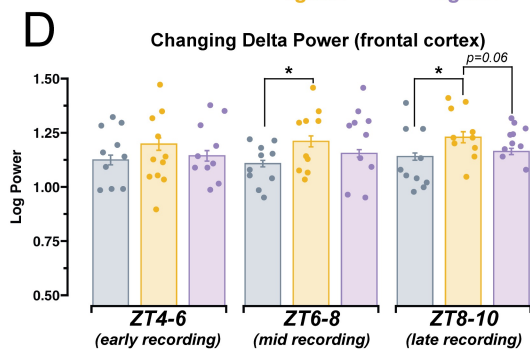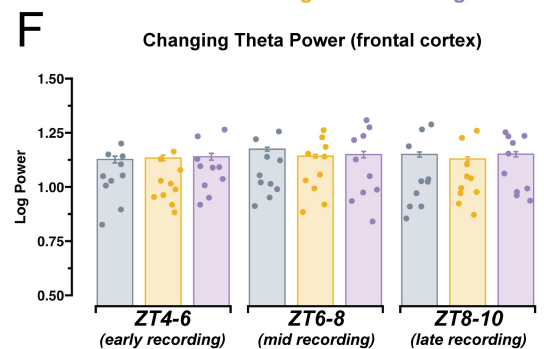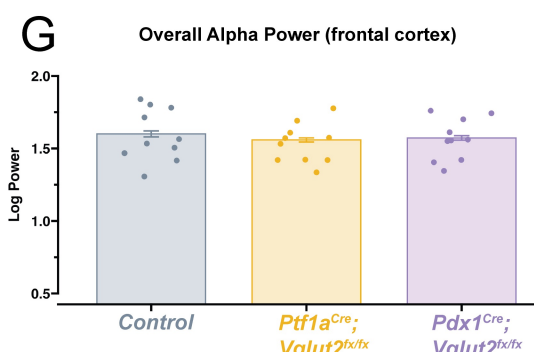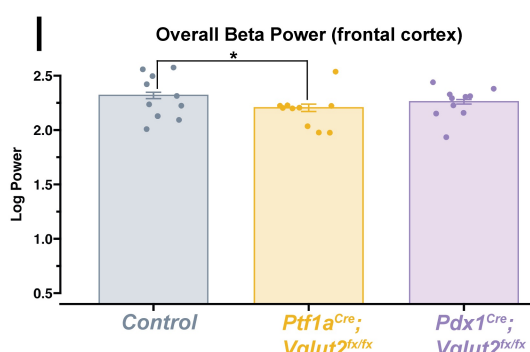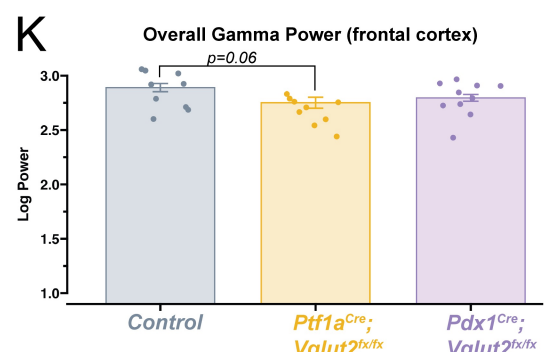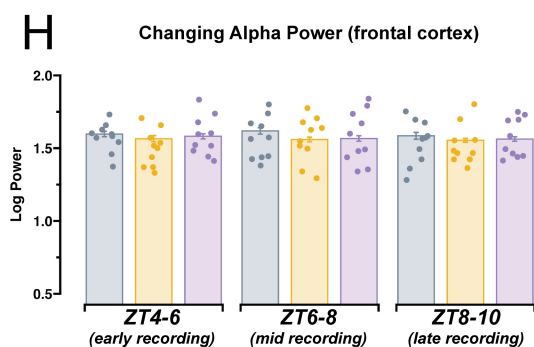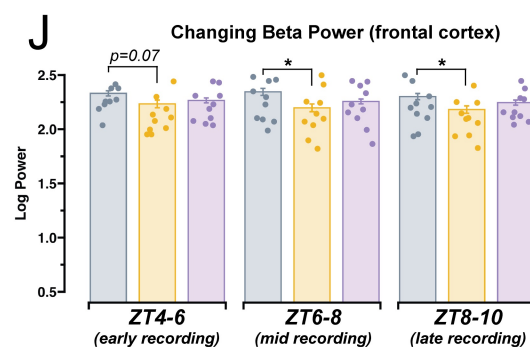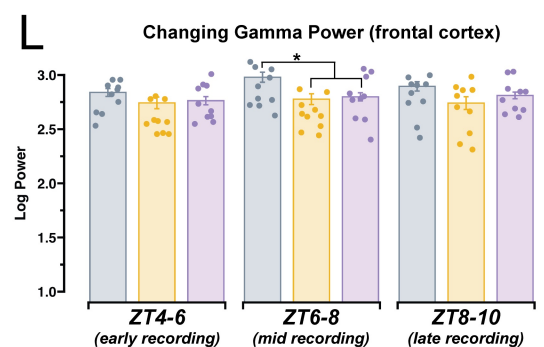

A

## Summary

| Mouse model                                                  | Motor phenotype                                                        | Circadian activity rhythms                                                               | Sleep impairments                                                                                                                           | ECoG activity                                                                                                             |
|--------------------------------------------------------------|------------------------------------------------------------------------|------------------------------------------------------------------------------------------|---------------------------------------------------------------------------------------------------------------------------------------------|---------------------------------------------------------------------------------------------------------------------------|
| <i>Ptf1a<sup>Cre</sup>;</i><br><i>Vglut2<sup>fx/fx</sup></i> | Severe dystonic-like behaviors<br><br>↑ EMG power in all sleep stages  | ↓ activity count<br><br>↑ siesta length<br><br>Normal endogenous period length           | ↑ time awake & NREM<br>↑ length of wake bouts<br>↑ number of NREM bouts<br>↑ REM latency<br>↓ time in REM<br>↓ number of REM bouts          | ↑ frontal delta power<br><br>↓ frontal beta power<br><br>↓ frontal gamma power ( $p=0.06$ )                               |
| <i>Pdx1<sup>Cre</sup>;</i><br><i>Vglut2<sup>fx/fx</sup></i>  | No overt motor dysfunction<br><br>Normal EMG power in all sleep stages | Normal activity count<br><br>Normal siesta length<br><br>Normal endogenous period length | ↑ time awake (NREM $p=.05$ )<br>↑ length of wake bouts<br>↑ number of NREM bouts<br>↑ REM latency<br>↓ time in REM<br>↓ number of REM bouts | ECoG spectral power not significantly different from <i>Ptf1a<sup>Cre</sup>;</i> <i>Vglut2<sup>fx/fx</sup></i> or Control |

B

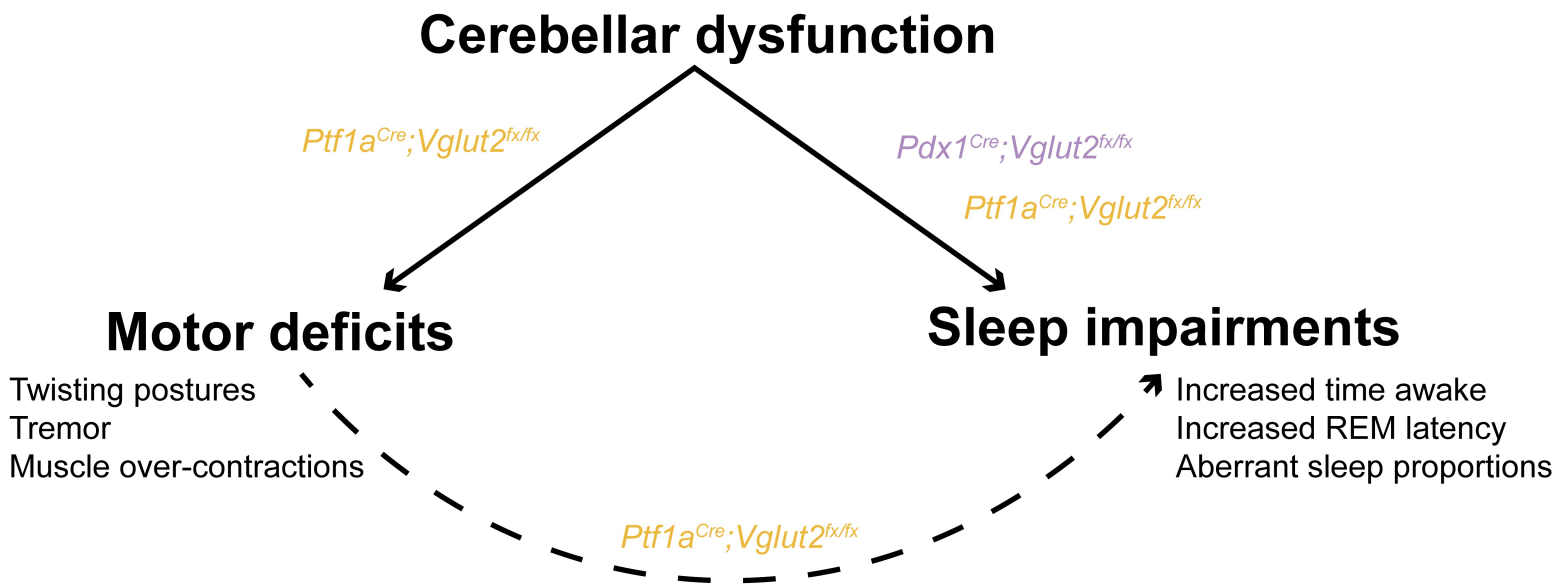

Source: https://www.biorxiv.org/content/biorxiv/early/2023/02/10/2023.02.09.527916.full.pdf
